# Supplementary material for: Benchmark experiments for higher-order and full-Stokes ice sheet models (ISMIP–HOM)
Source: Copernicus journal article supplement (doi:10.5194/tc-2-95-2008), 2008-08-26
Supplement: Supplementary file 2 [file tc-2-95-2008-supplement.zip]

Laboratoire de Glaciologie, CP 160/03  
DSTE - ULB  
50 Av. F.D. Roosevelt  
1050 Bruxelles

ISMIP-HOM results - December 2007.

Laura Perichon

# Experiment A

This is a 3D ice-sheet experiment (please see details in the 2006 ISMIP-HOM inter-comparison exercise settings).

Firstly, we present velocity at surface, shear stress  $\tau_{xz}$  and dp in the x direction for  $y = 0.25$  for all domain lengths.

Secondly, we present the maximum/minimum over whole domain at each domain length for velocity in x direction (and the maximum amplitude of the velocity in the x direction), for shear stress  $\tau_{xz}$  and dp. Those results are presented here together with the ExpC results for the same variables to enhance differences and similarities.

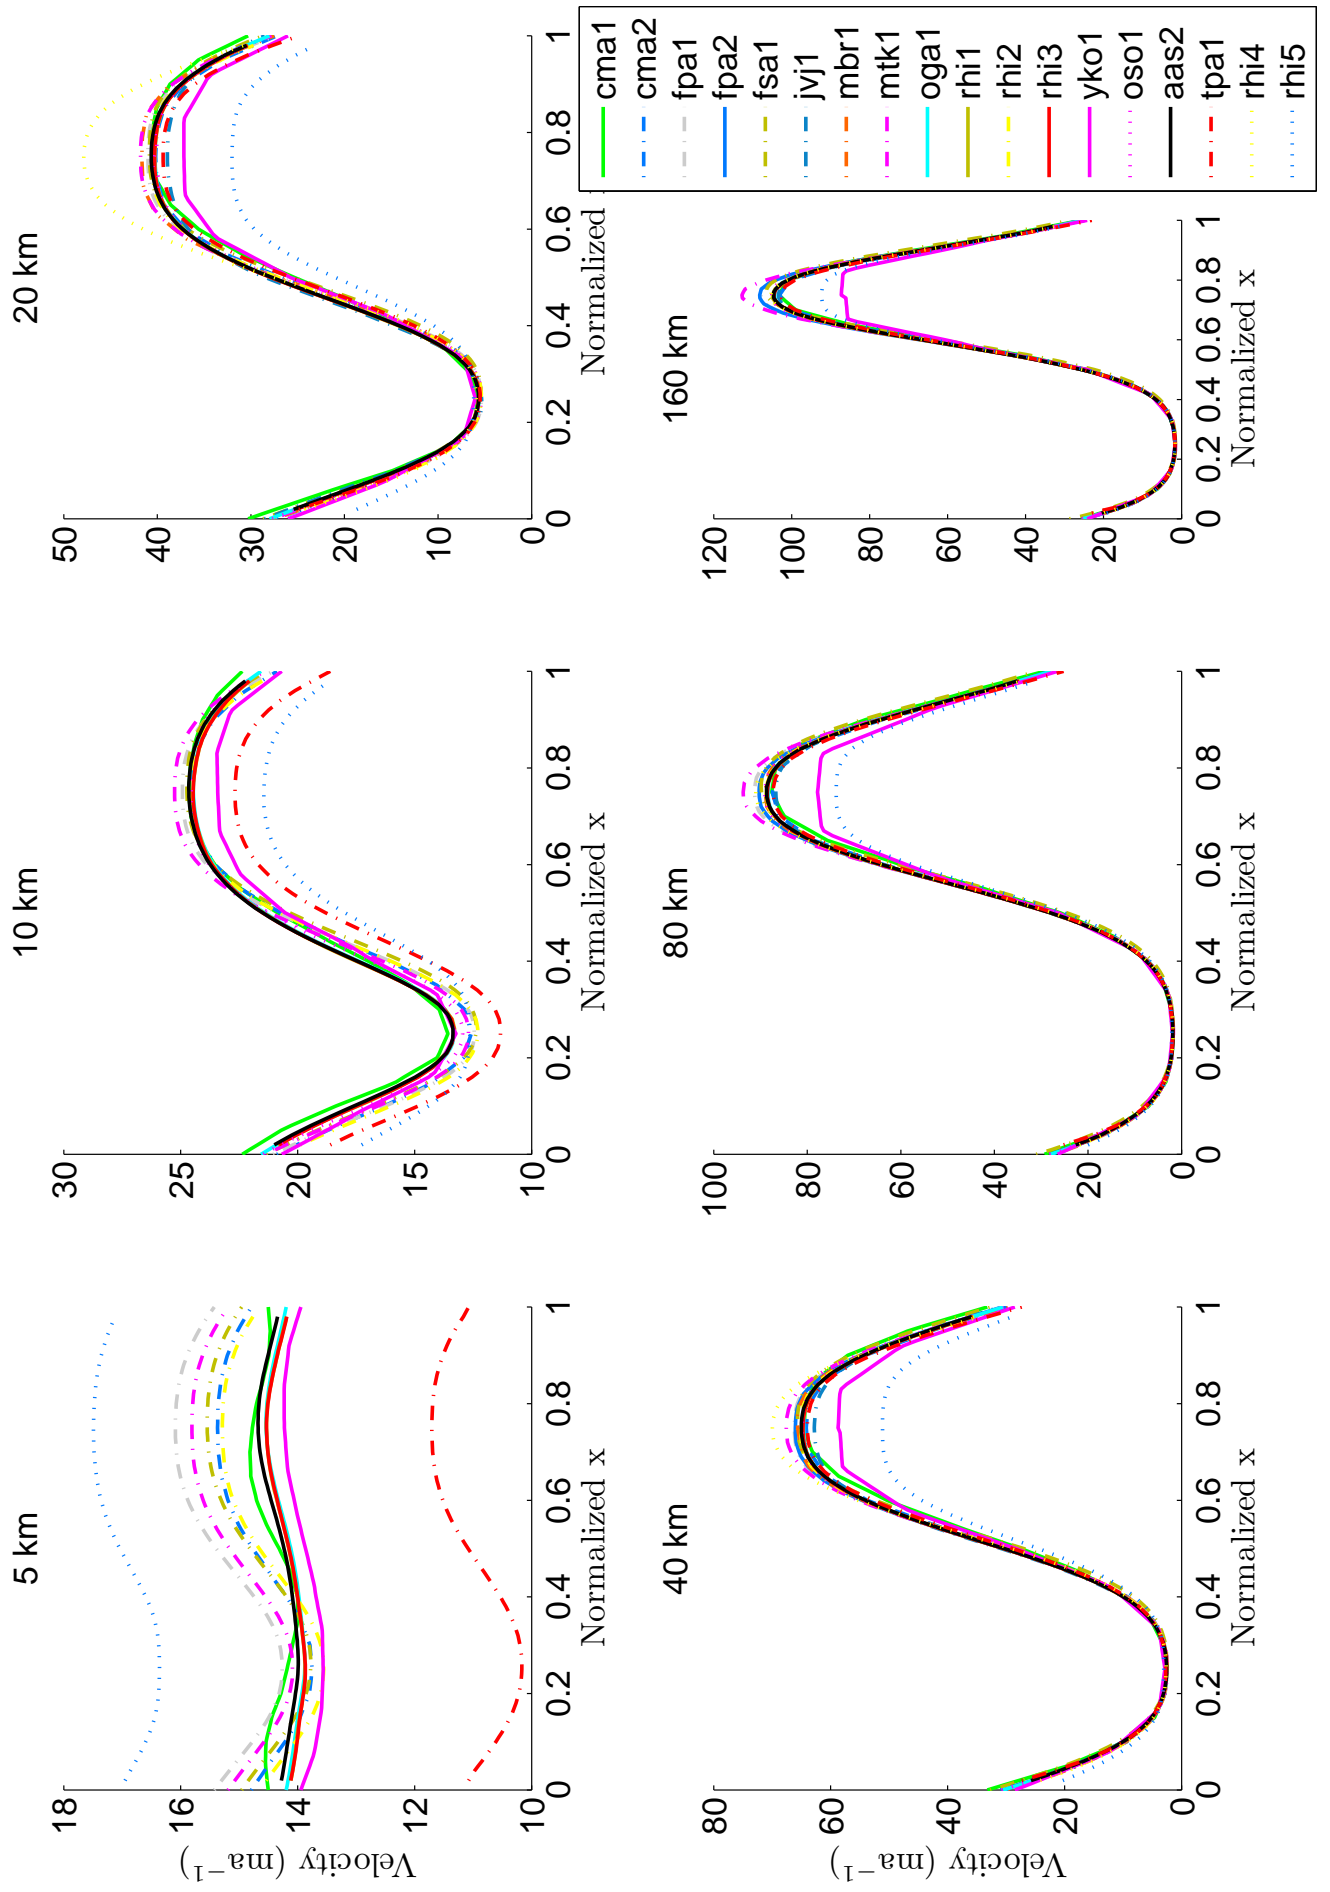

FIG. 1 – ExpA - Surface velocity in the x direction for each domain length.

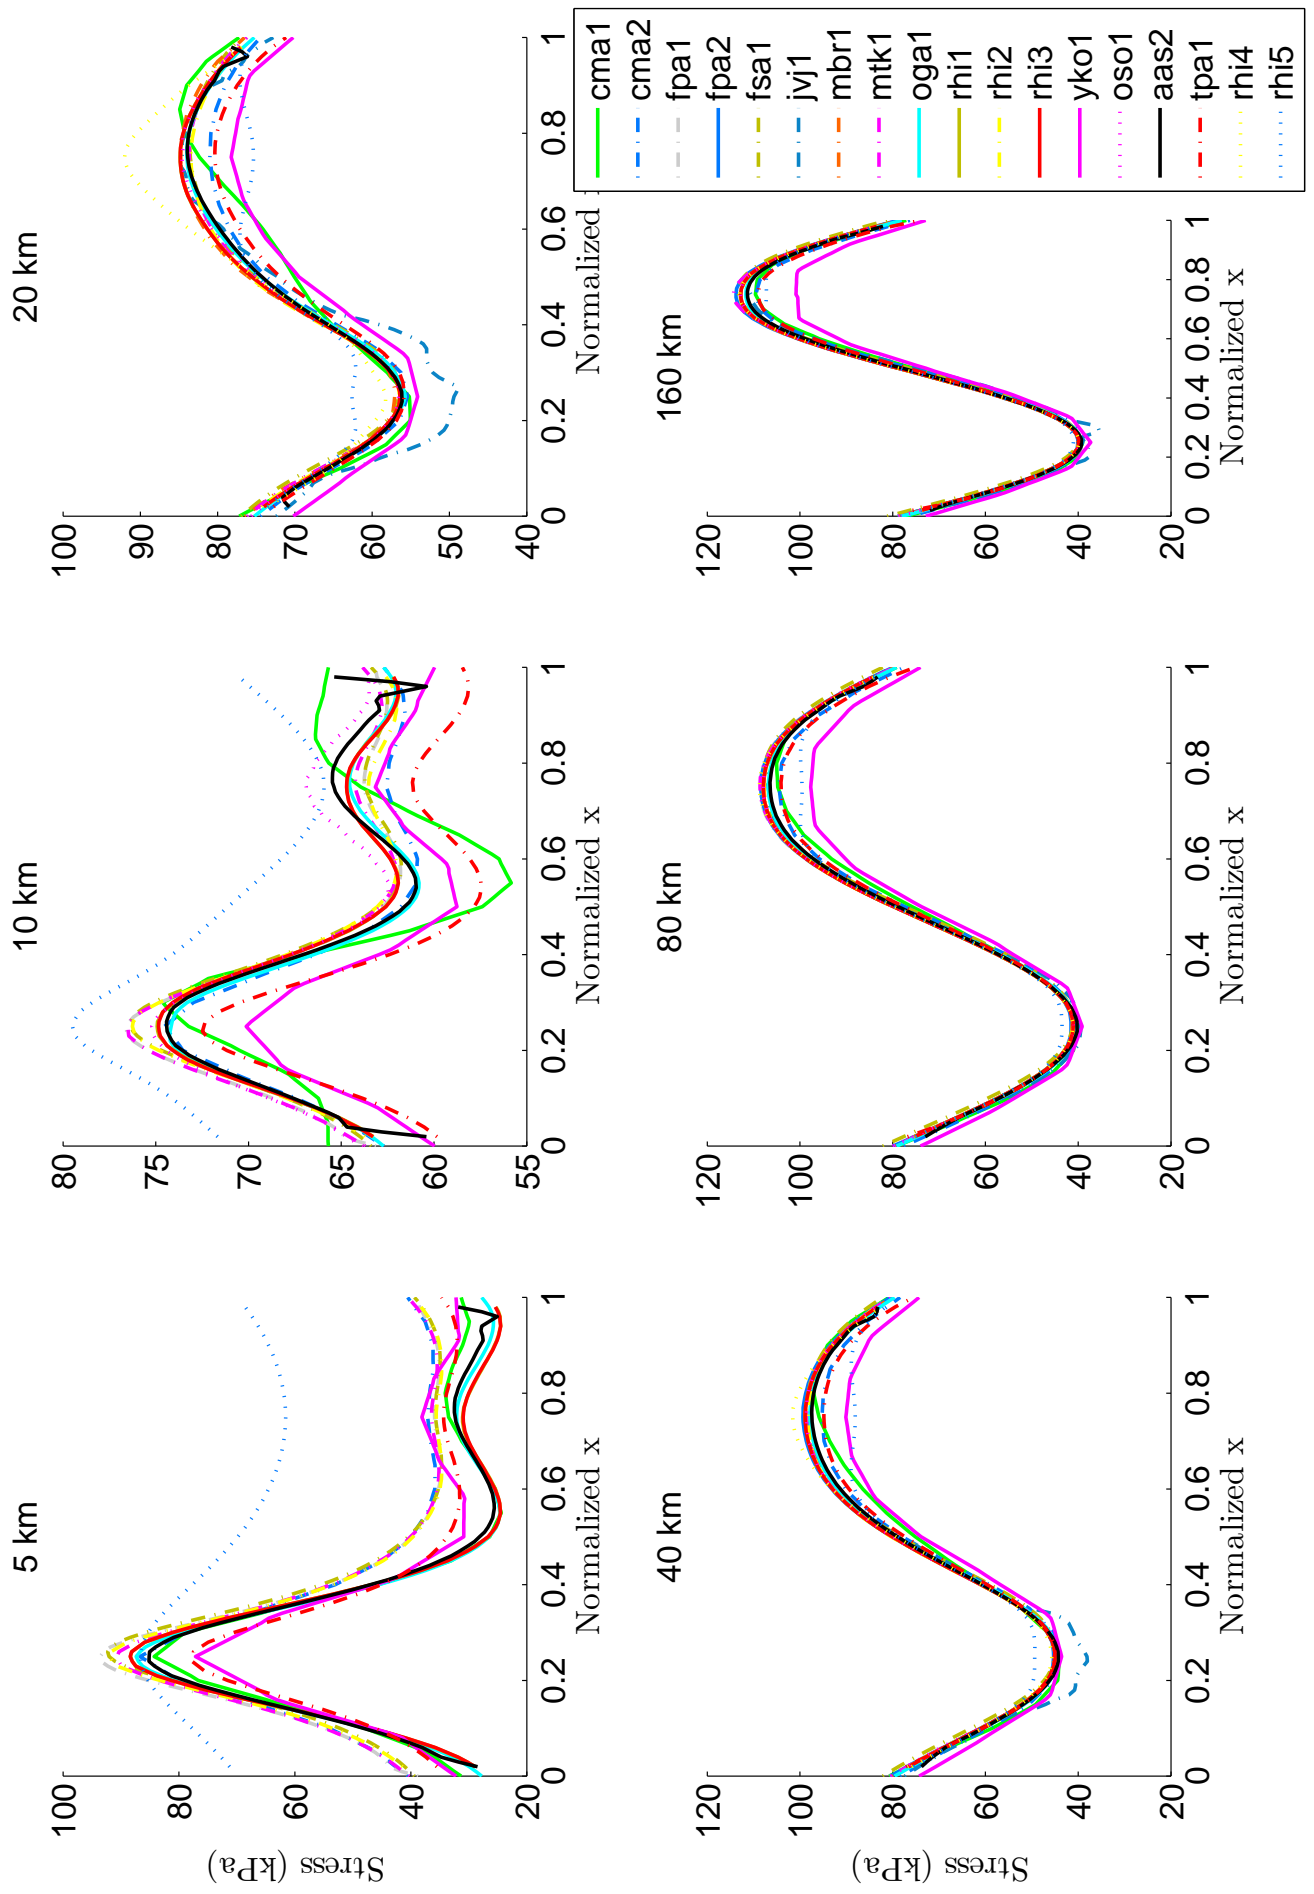

FIG. 2 – ExpA - Shear stress  $txz$  for each domain length.

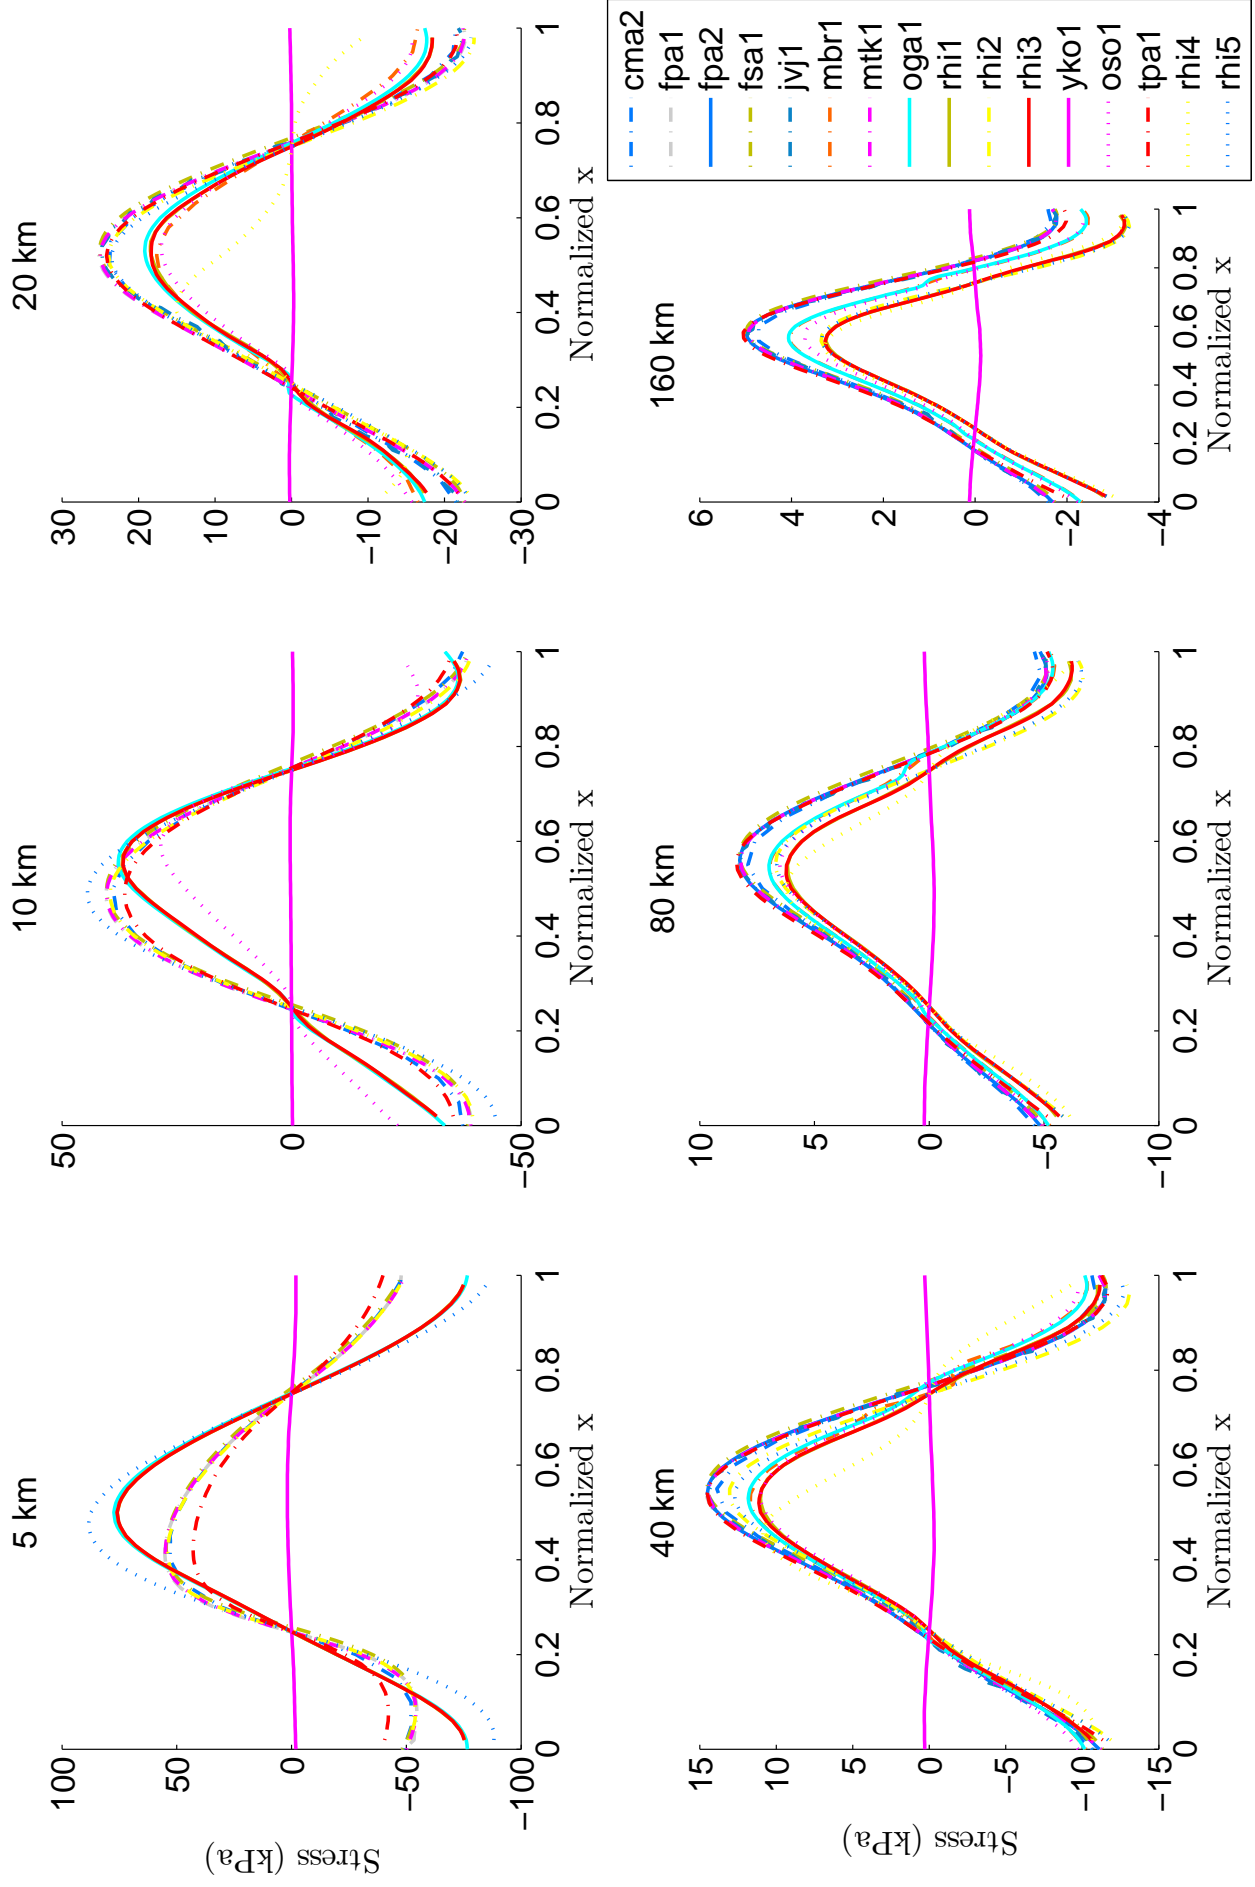

FIG. 3 – ExpA - Dp for each domain length.

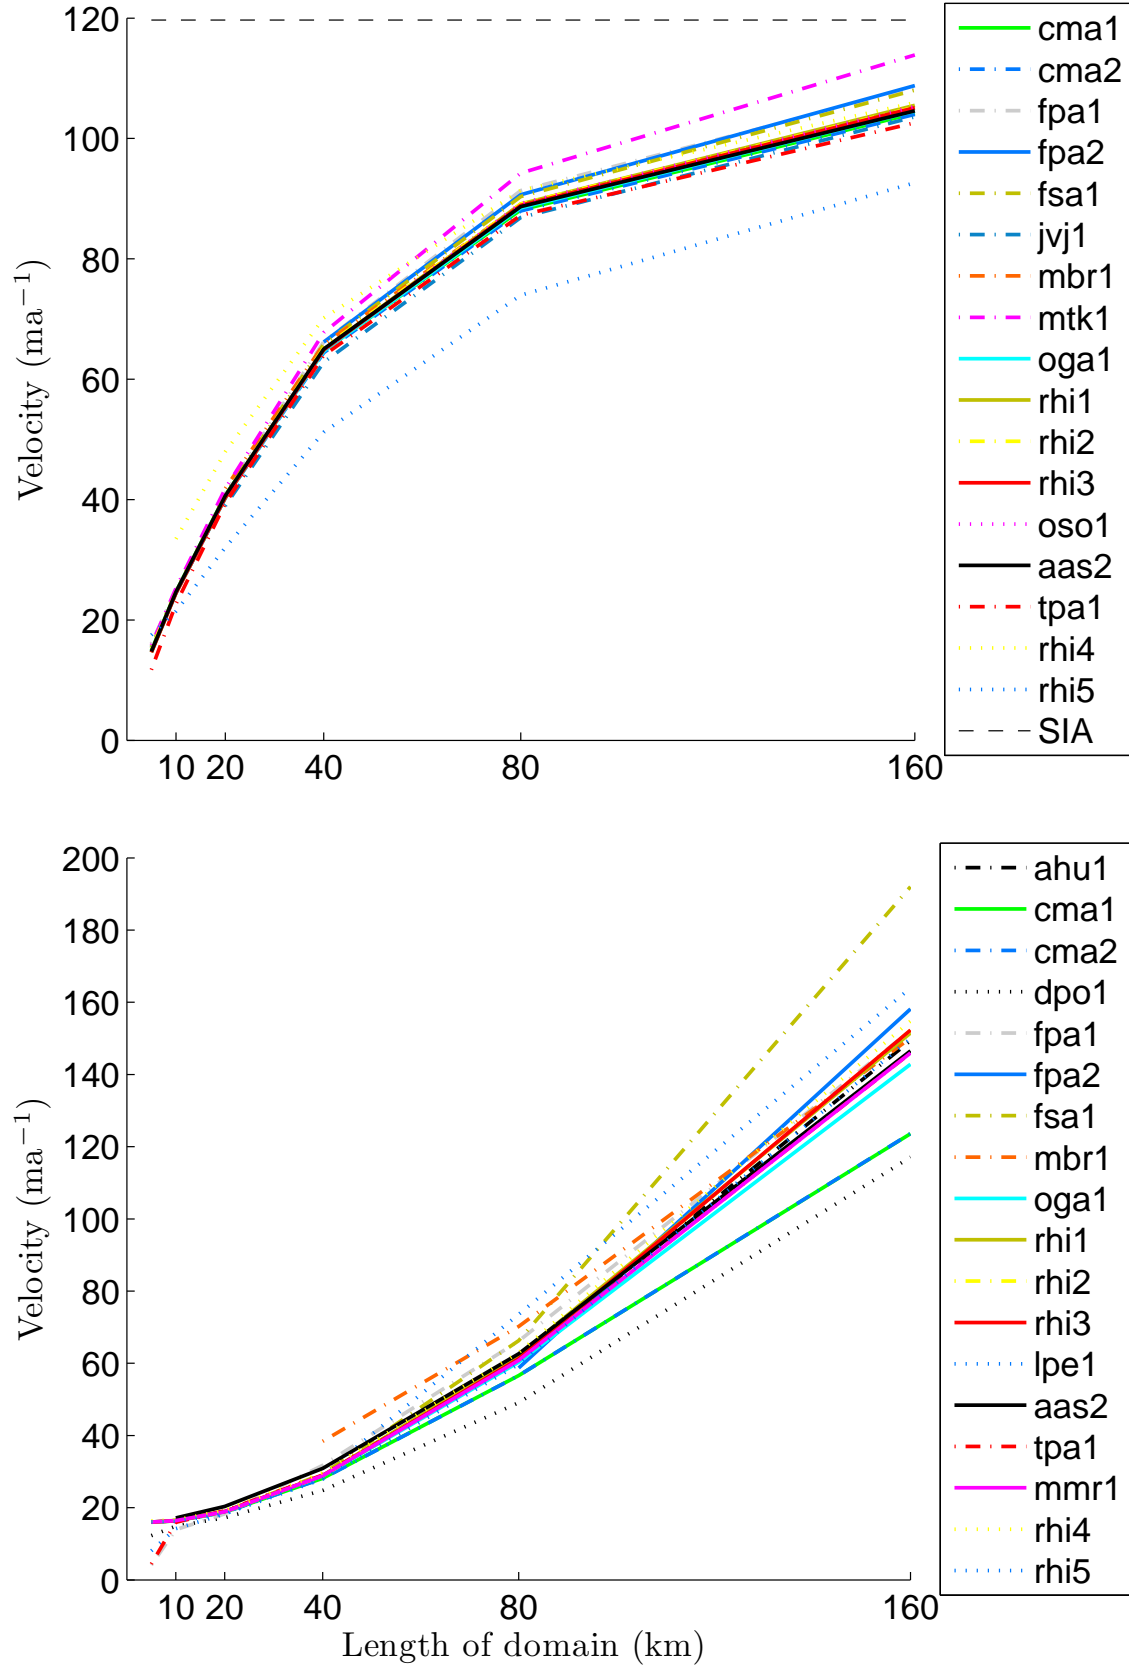

FIG. 4 – ExpAC - Maximum surface velocity value in x direction for each domain length.

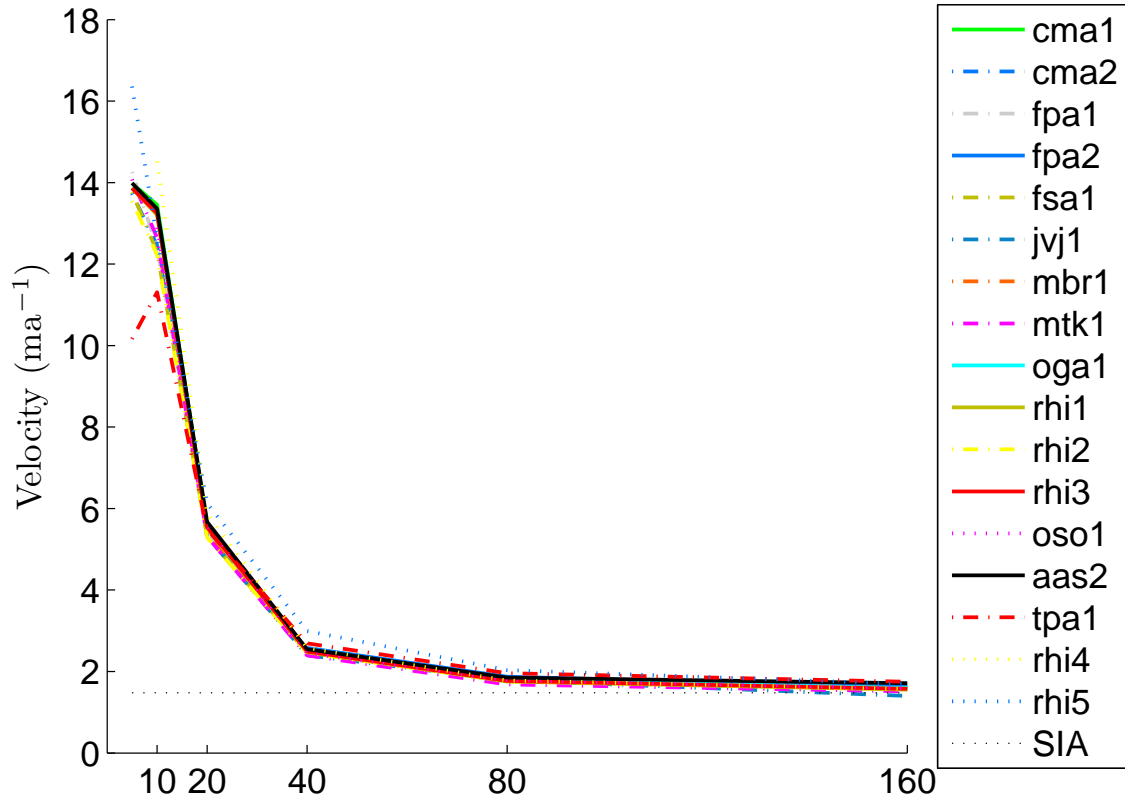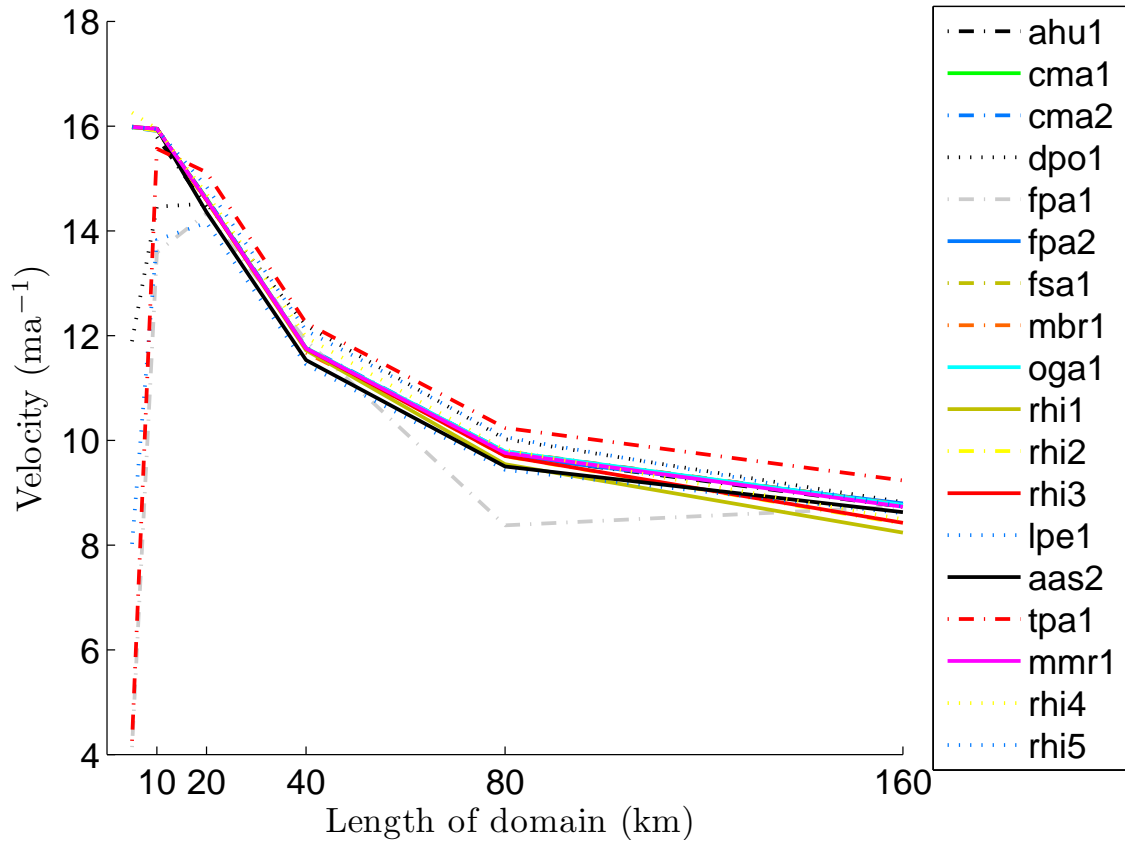

FIG. 5 – ExpAC - Minimum surface velocity value in x direction for each domain length.

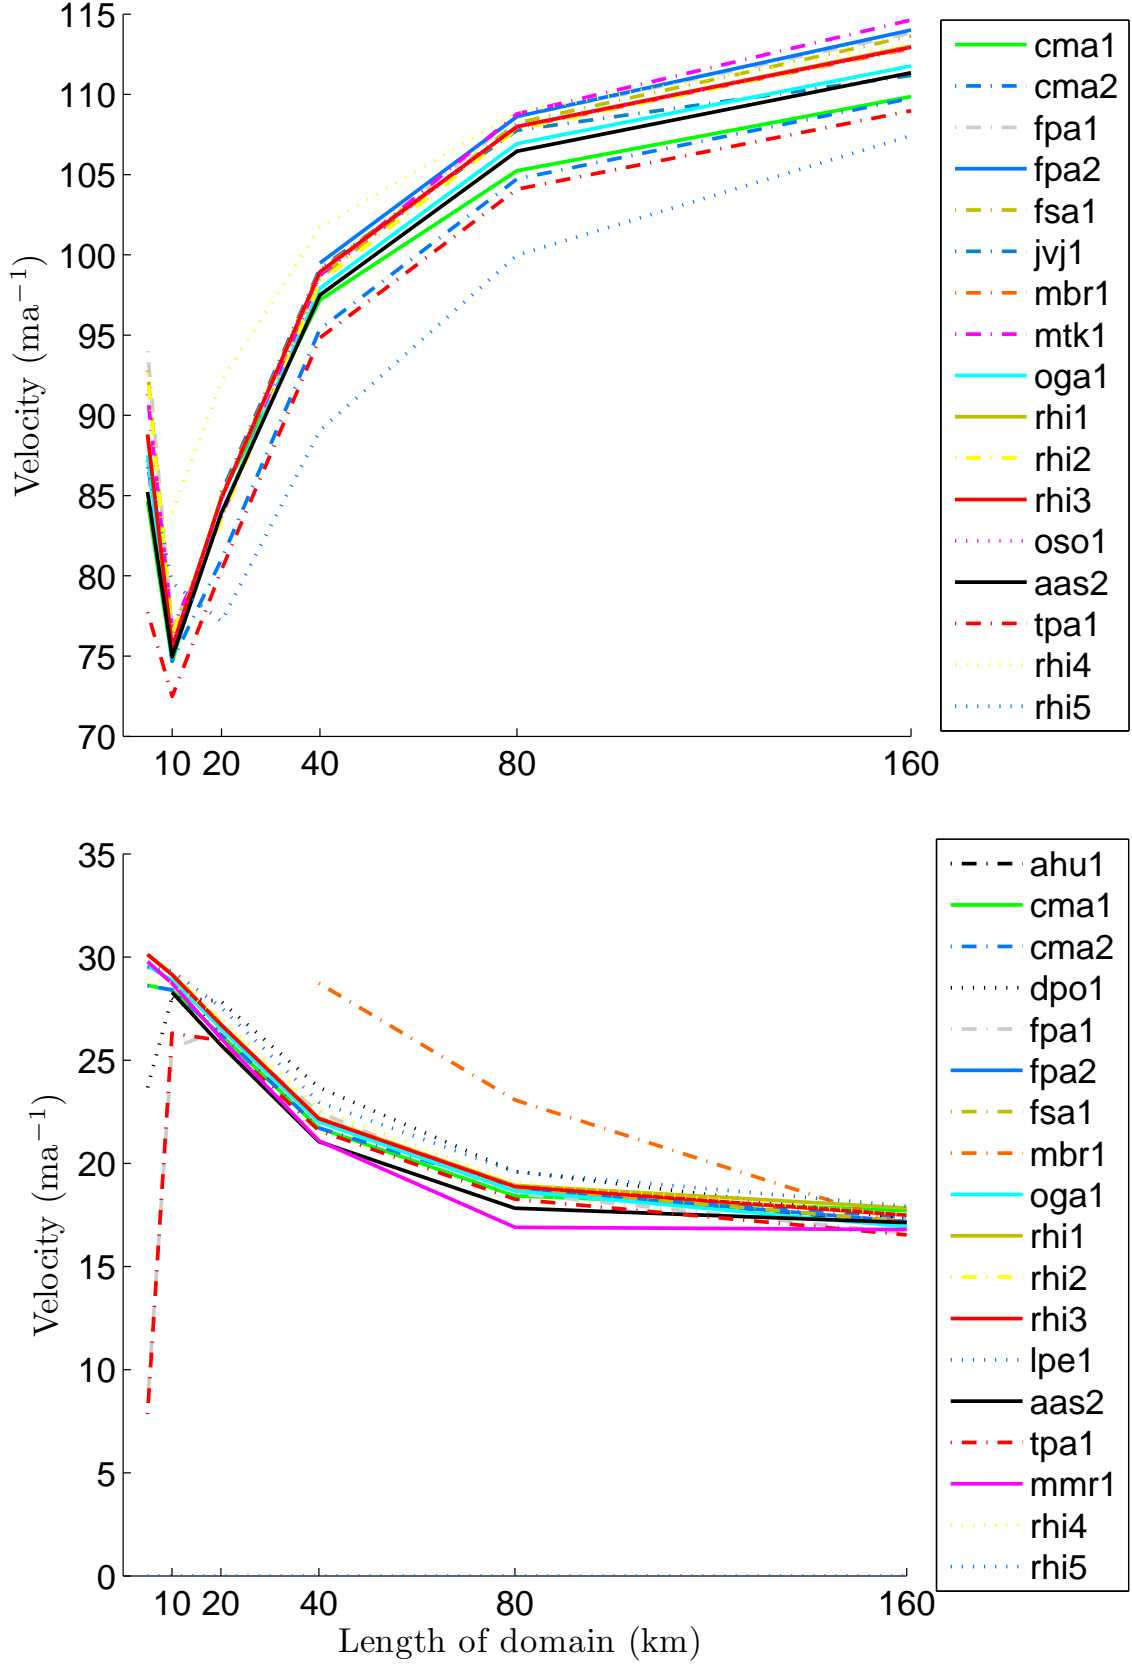

FIG. 6 – ExpAC - Maximum shear stress  $\tau_{xz}$  value for each domain length.



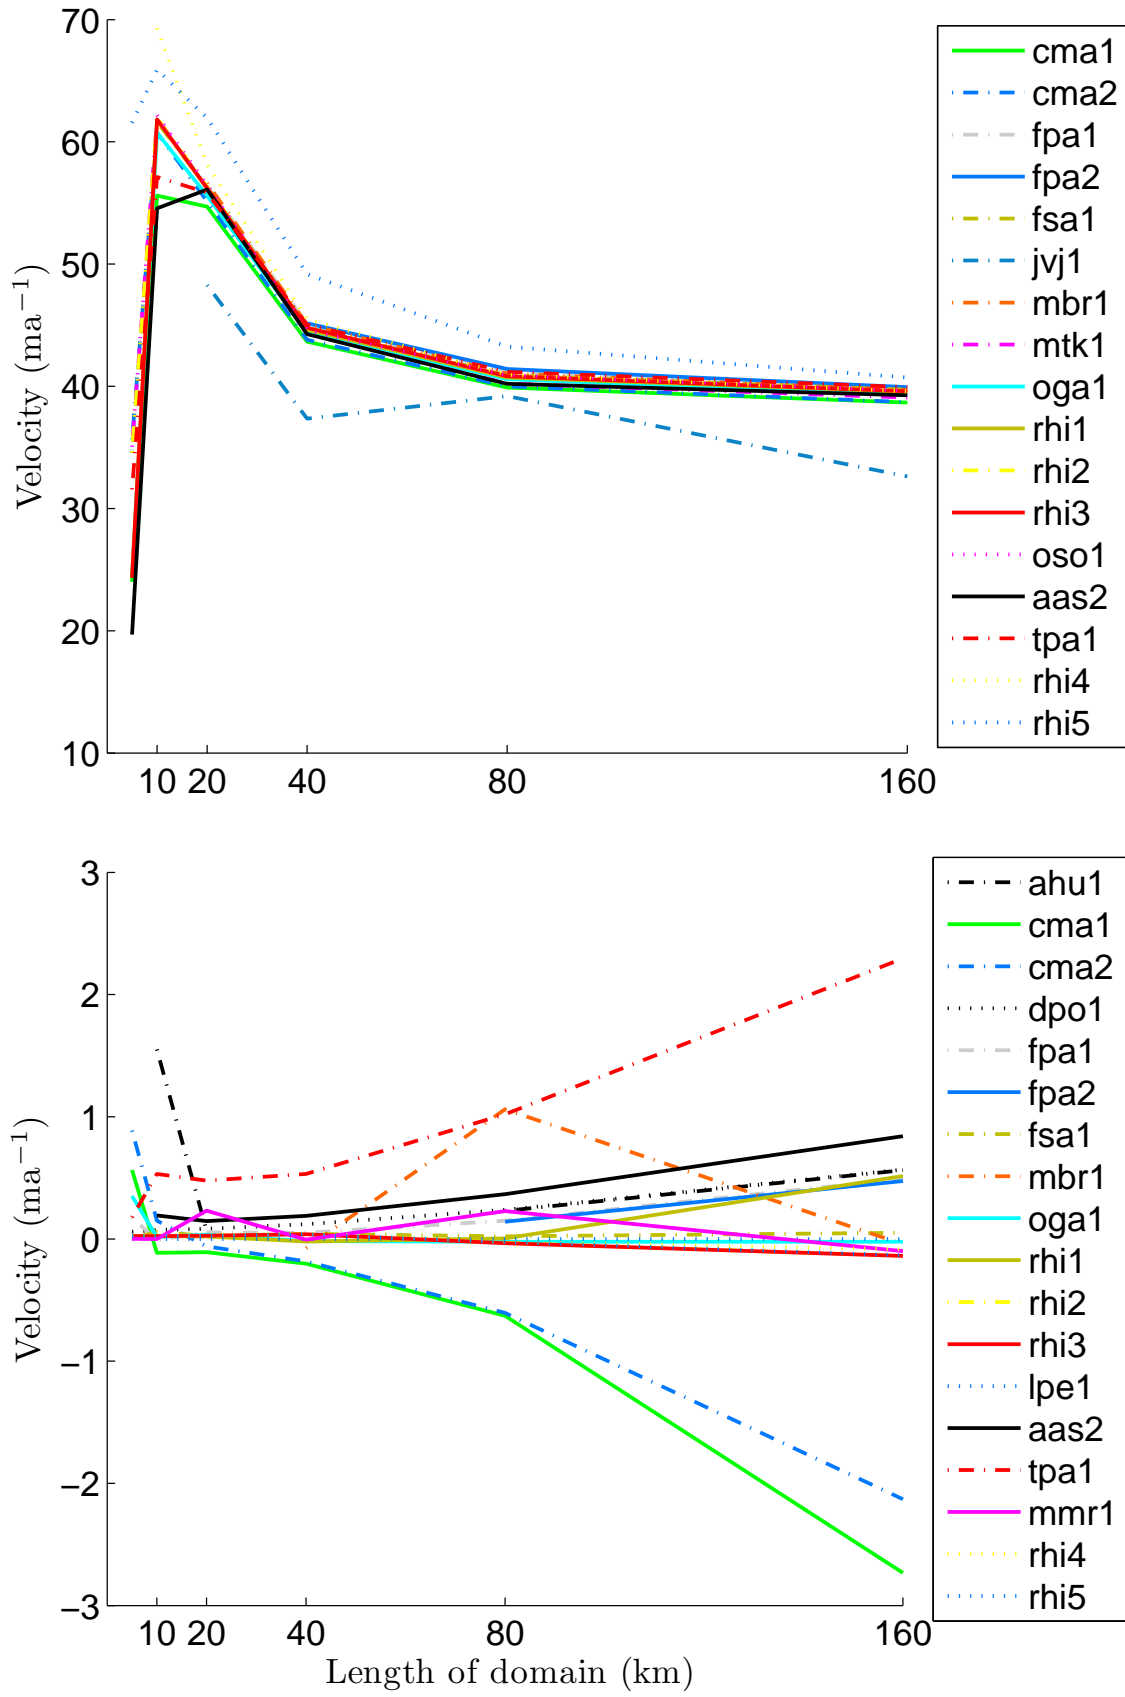

FIG. 7 – ExpAC - Minimum shear stress  $\tau_{xz}$  value for each domain length.

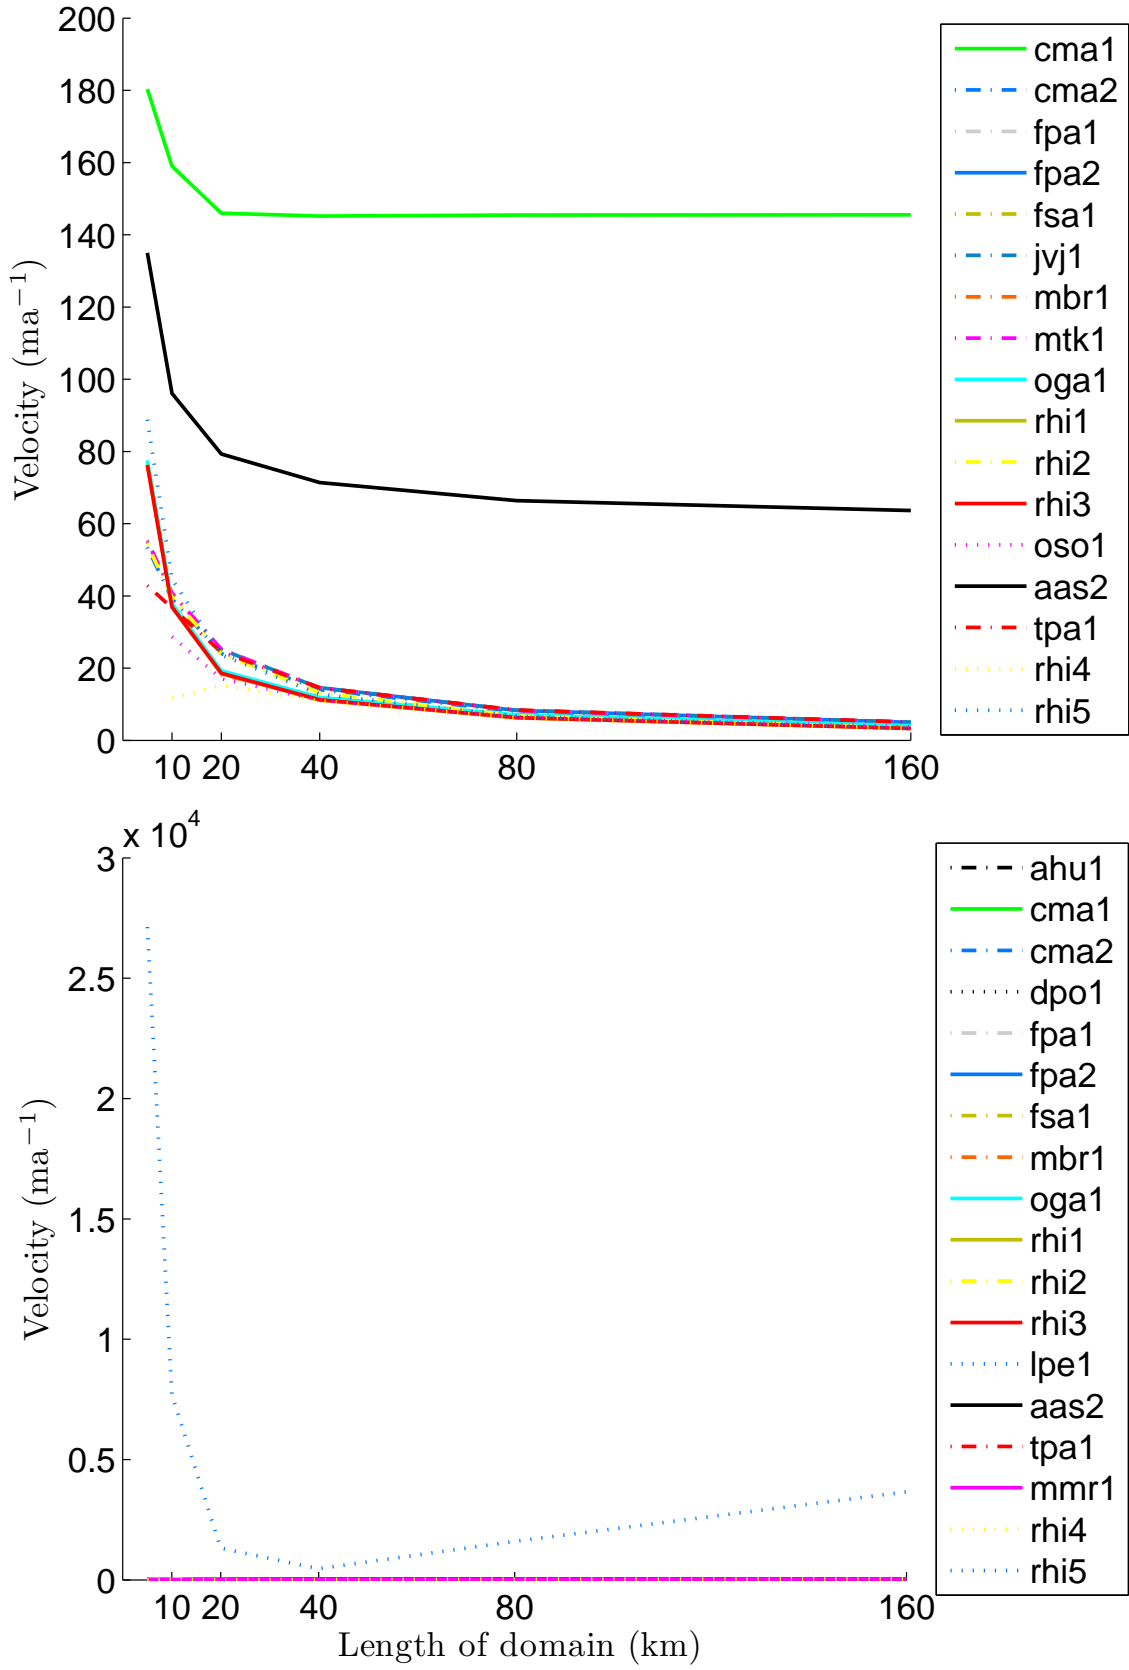

FIG. 8 – ExpAC - Maximum dp value

# Experiment B

This is a 2D ice-sheet experiment (flowline). Please see details in the 2006 ISMIP-HOM intercomparison exercise settings.

Firstly, we present velocity at surface, shear stress  $\tau_{xz}$  and  $dp$  in the  $x$  direction for  $y = 0.25$  for domain lengths of 5 *km* and 10 *km* (lengthscales where significant differences and variations are observed).

Secondly, we present the maximum/minimum over whole domain at each domain length for velocity in  $x$  direction (and the maximum amplitude of the velocity in the  $x$  direction), for shear stress  $\tau_{xz}$  and  $dp$ .

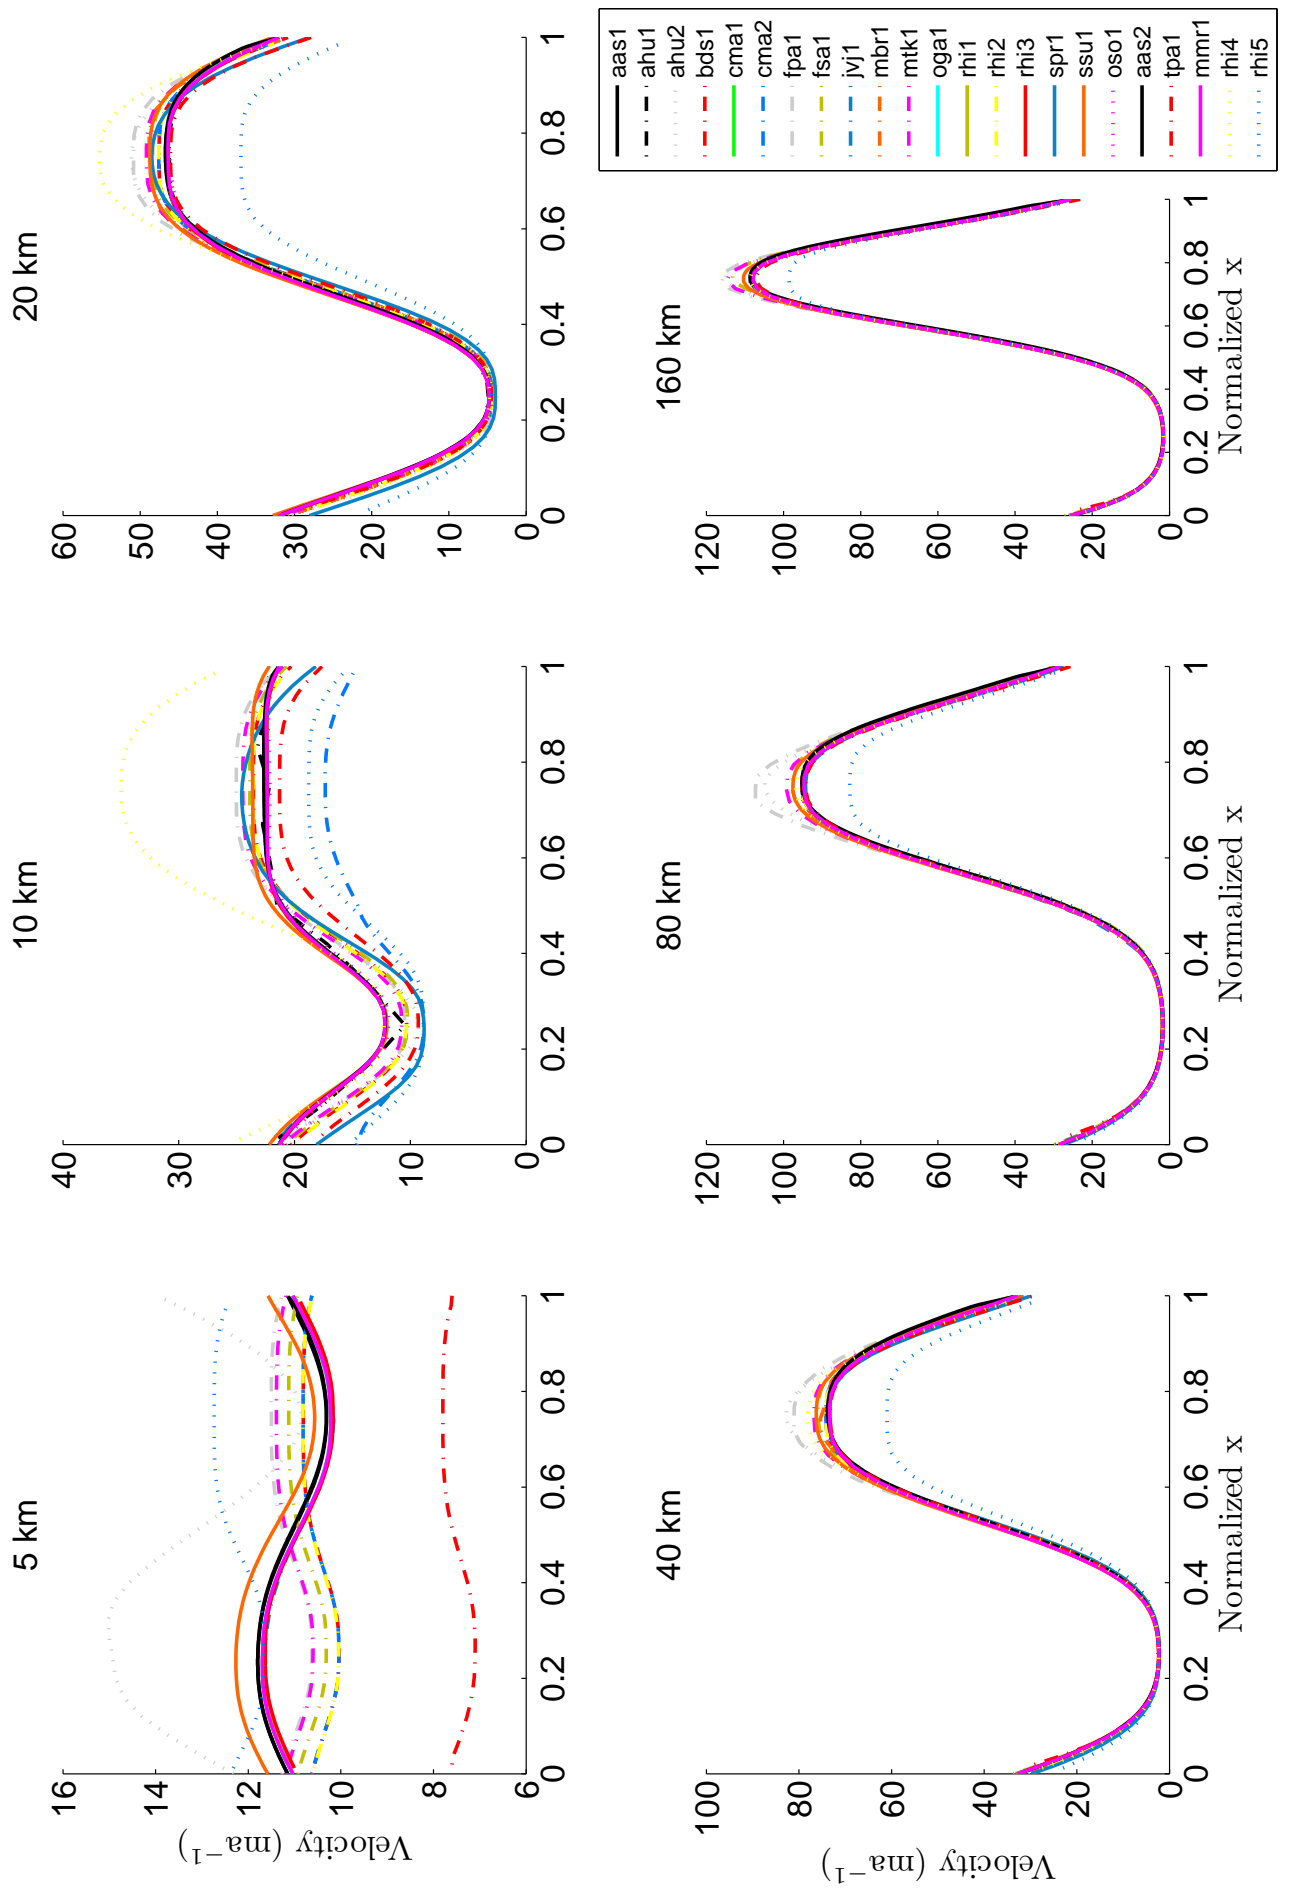

FIG. 9 – ExpB – Surface velocity in the x direction for each domain length.

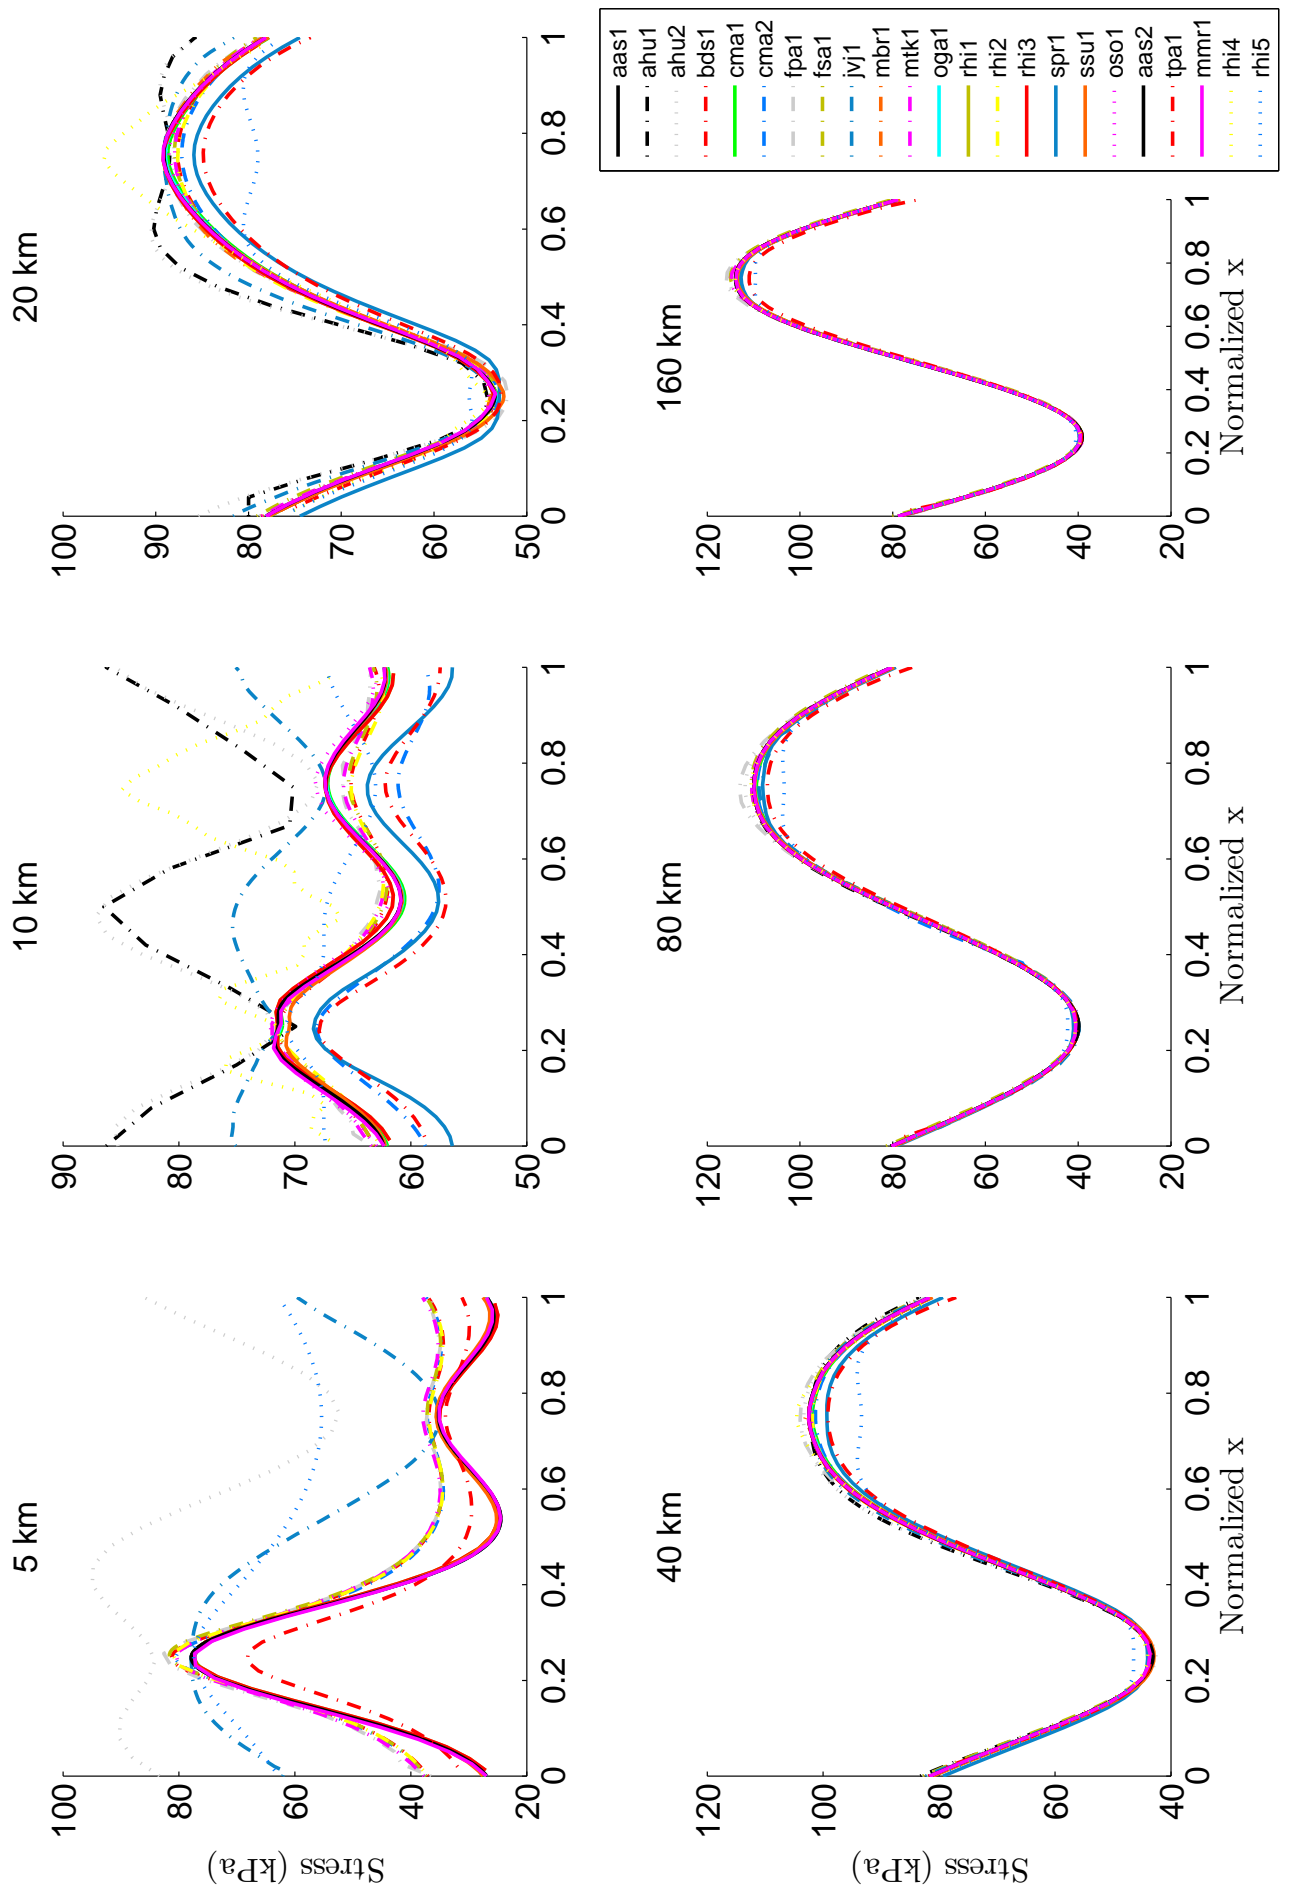

FIG. 10 – ExpB - Shear stress  $txz$  for each domain length.

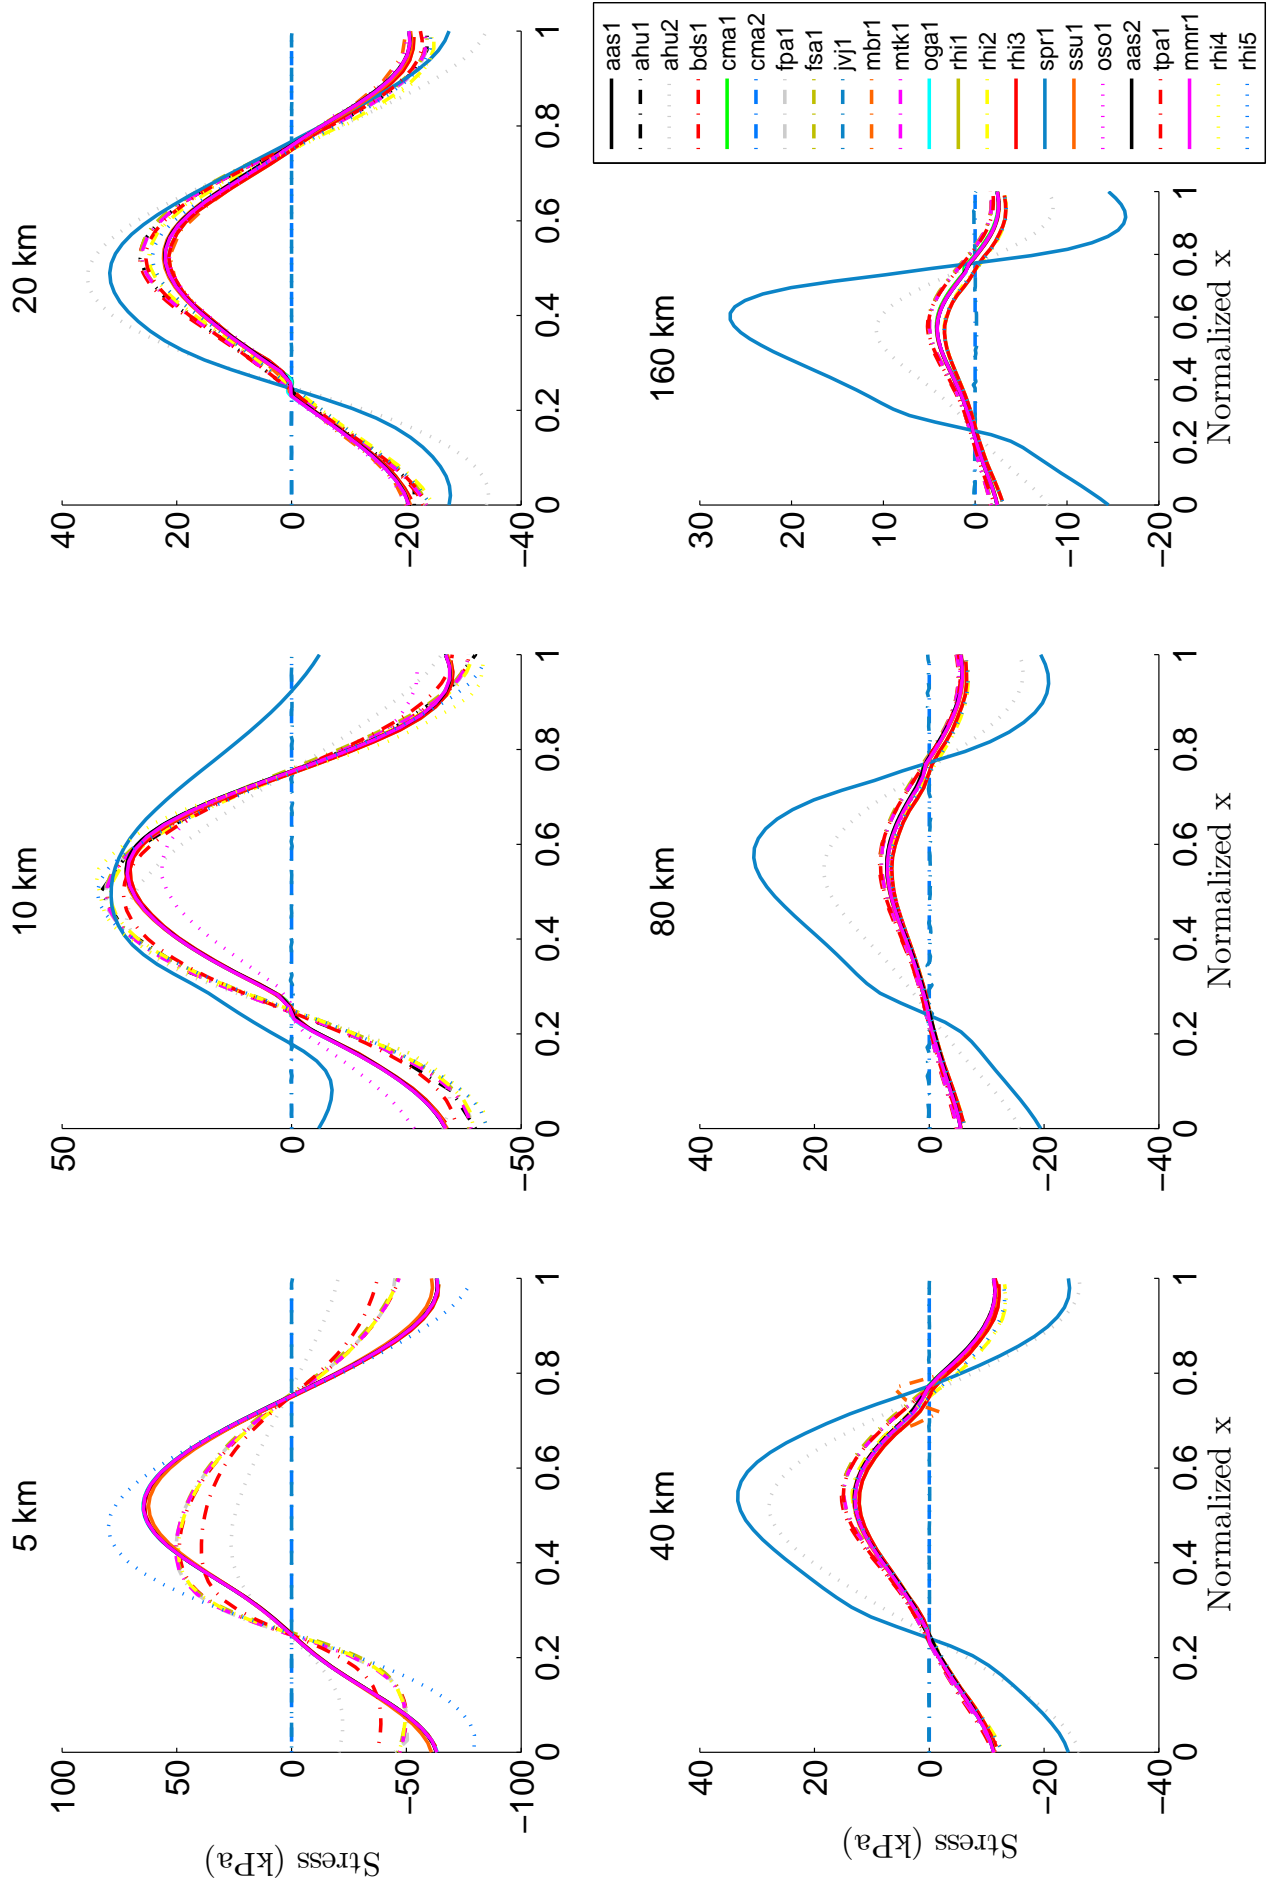

FIG. 11 – ExpB - Dp for each domain length.

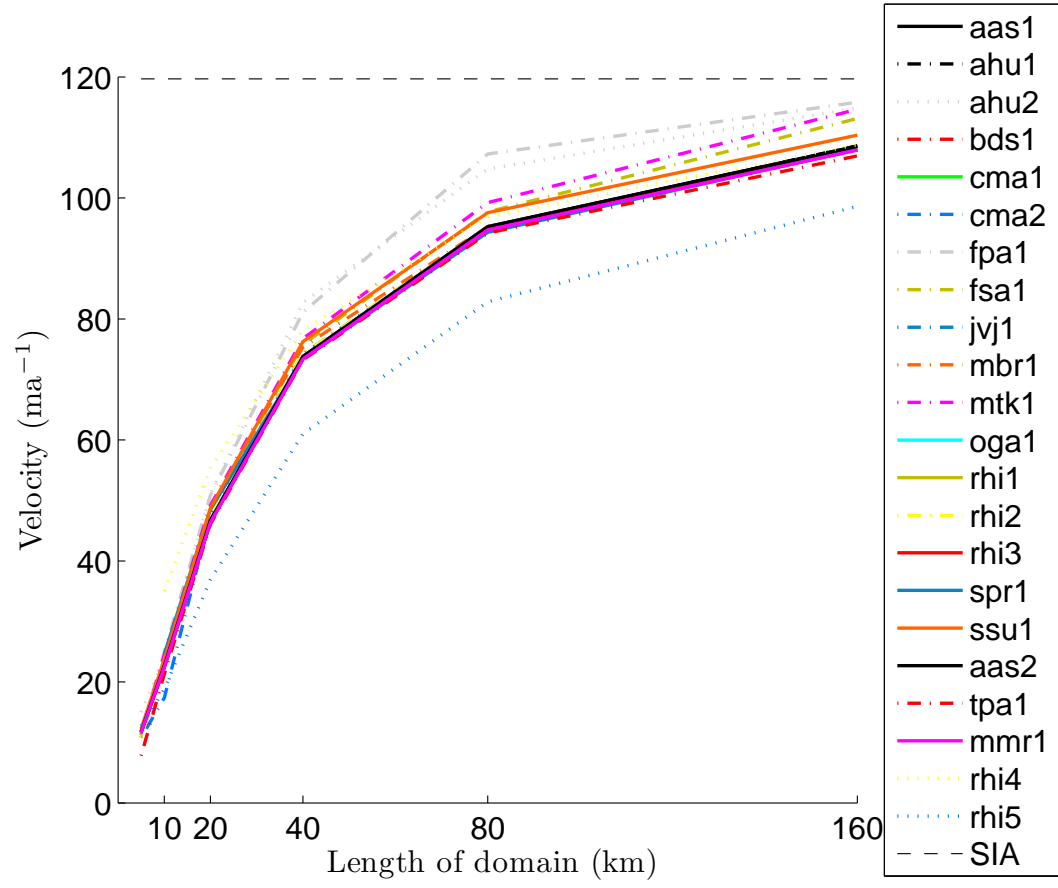

FIG. 12 – ExpB - Maximum surface velocity value in x direction for each domain length.



FIG. 13 – ExpB - Minimum surface velocity value in x direction for each domain length.



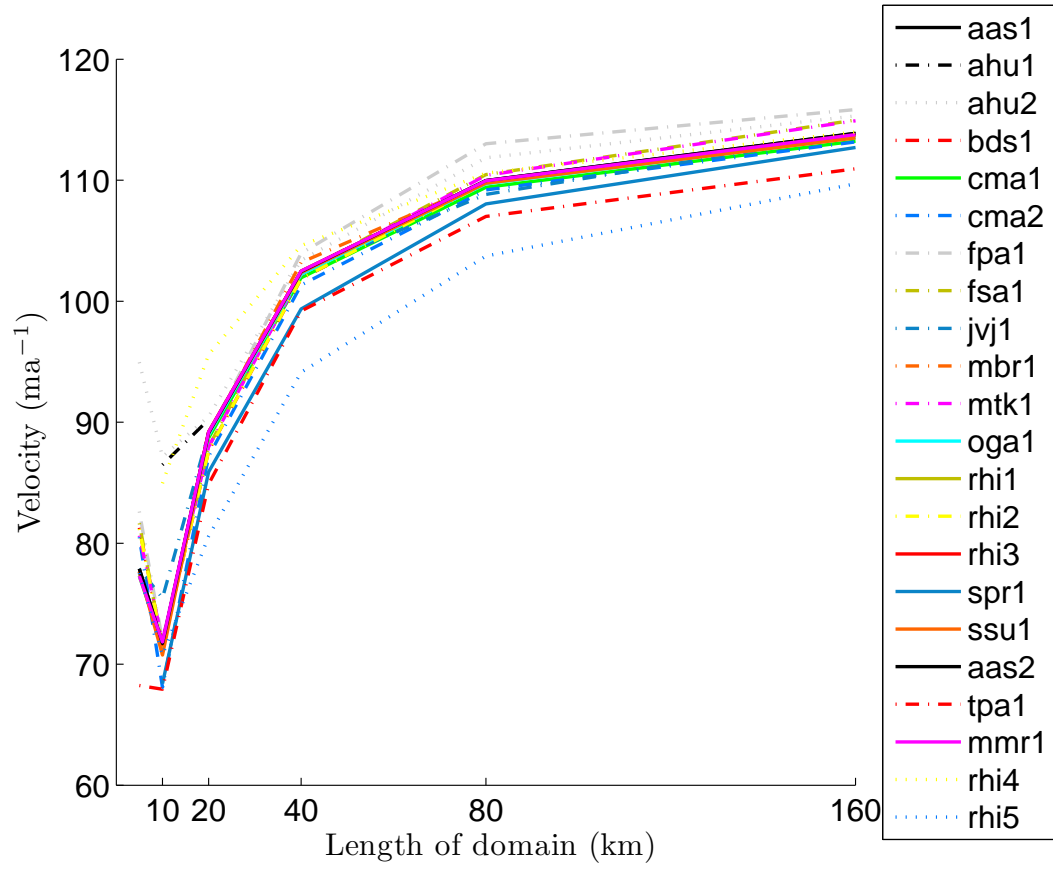

FIG. 14 – ExpB - Maximum shear stress  $\tau_{xz}$  value for each domain length.

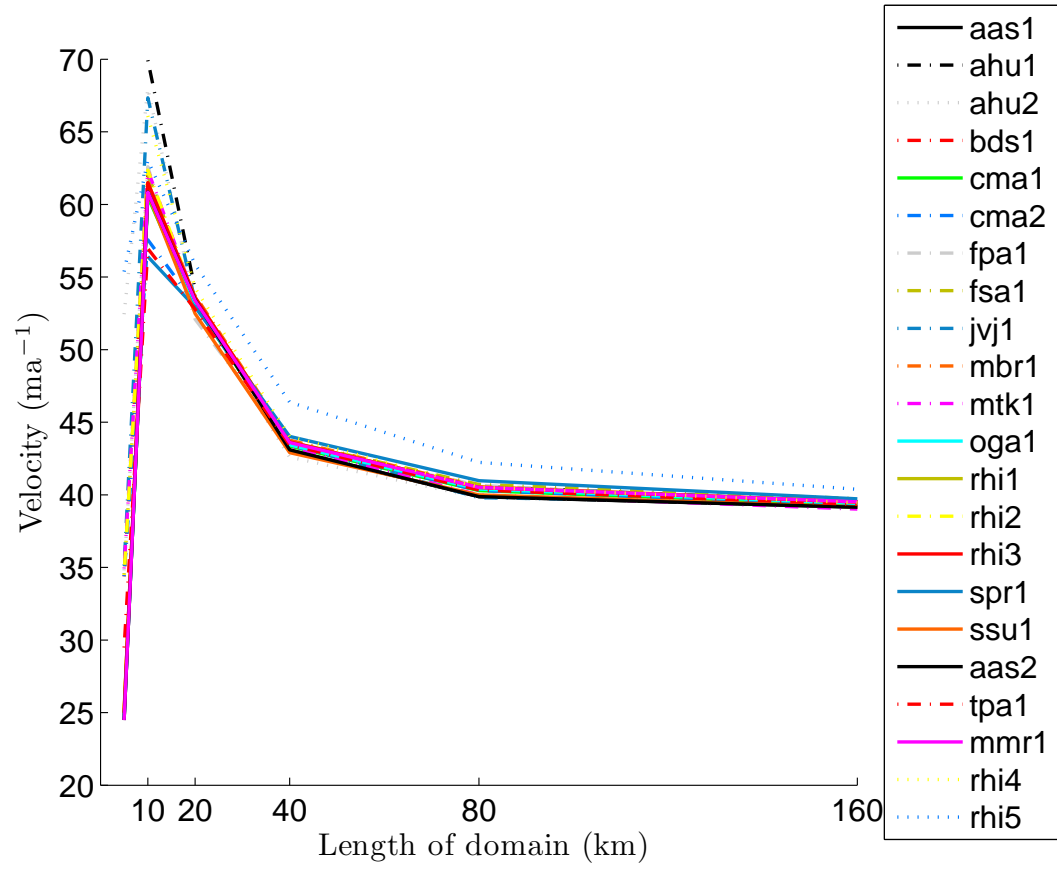

FIG. 15 – ExpB - Minimum shear stress  $\tau_{xz}$  value for each domain length.

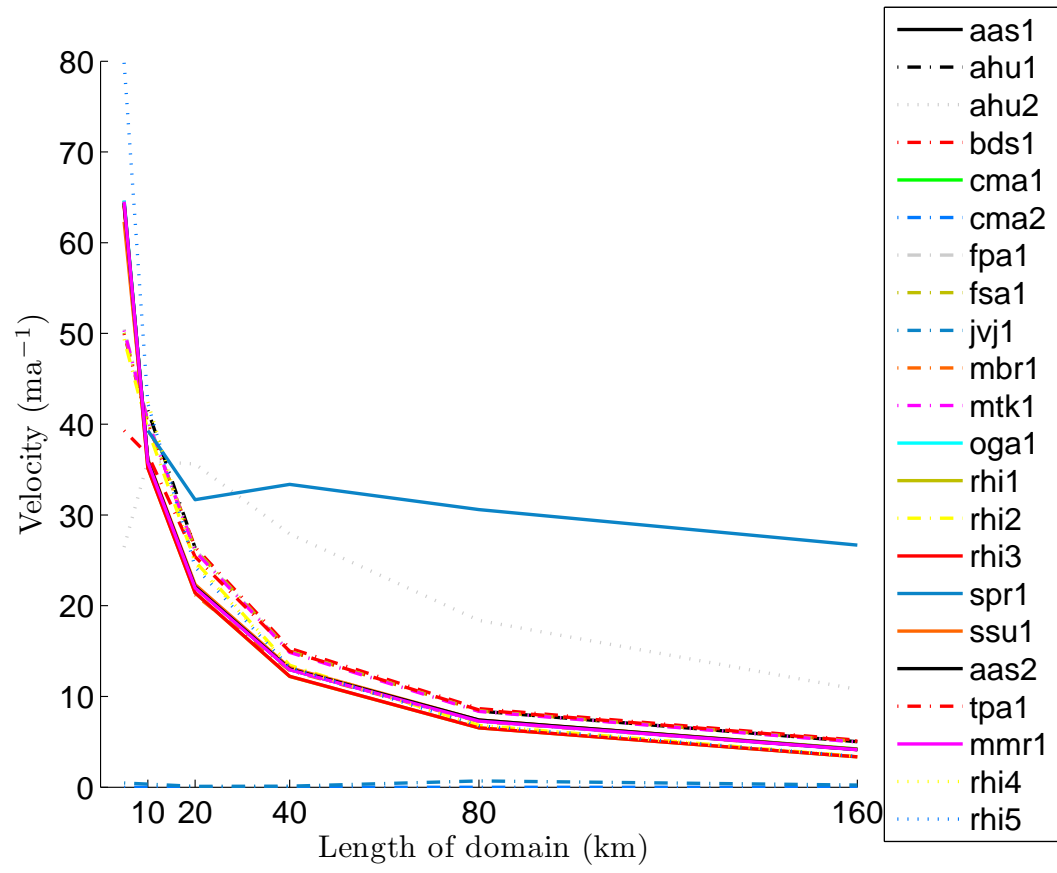

FIG. 16 – ExpB - Maximum dp value

# Experiment C

This is a 3D ice-stream experiment. Please see details in the 2006 ISMIP-HOM intercomparison exercise settings.

Firstly, we present velocity at surface, shear stress  $\tau_{xz}$  and  $dp$  in the x direction for  $y = 0.25$  for domain lengths of 5 *km* and 10 *km* (lengthscales where significant differences and variations are observed).

Secondly, we present the maximum/minimum over whole domain at each domain length for velocity in x direction (and the maximum amplitude of the velocity in the x direction), for shear stress  $\tau_{xz}$  and  $dp$ .

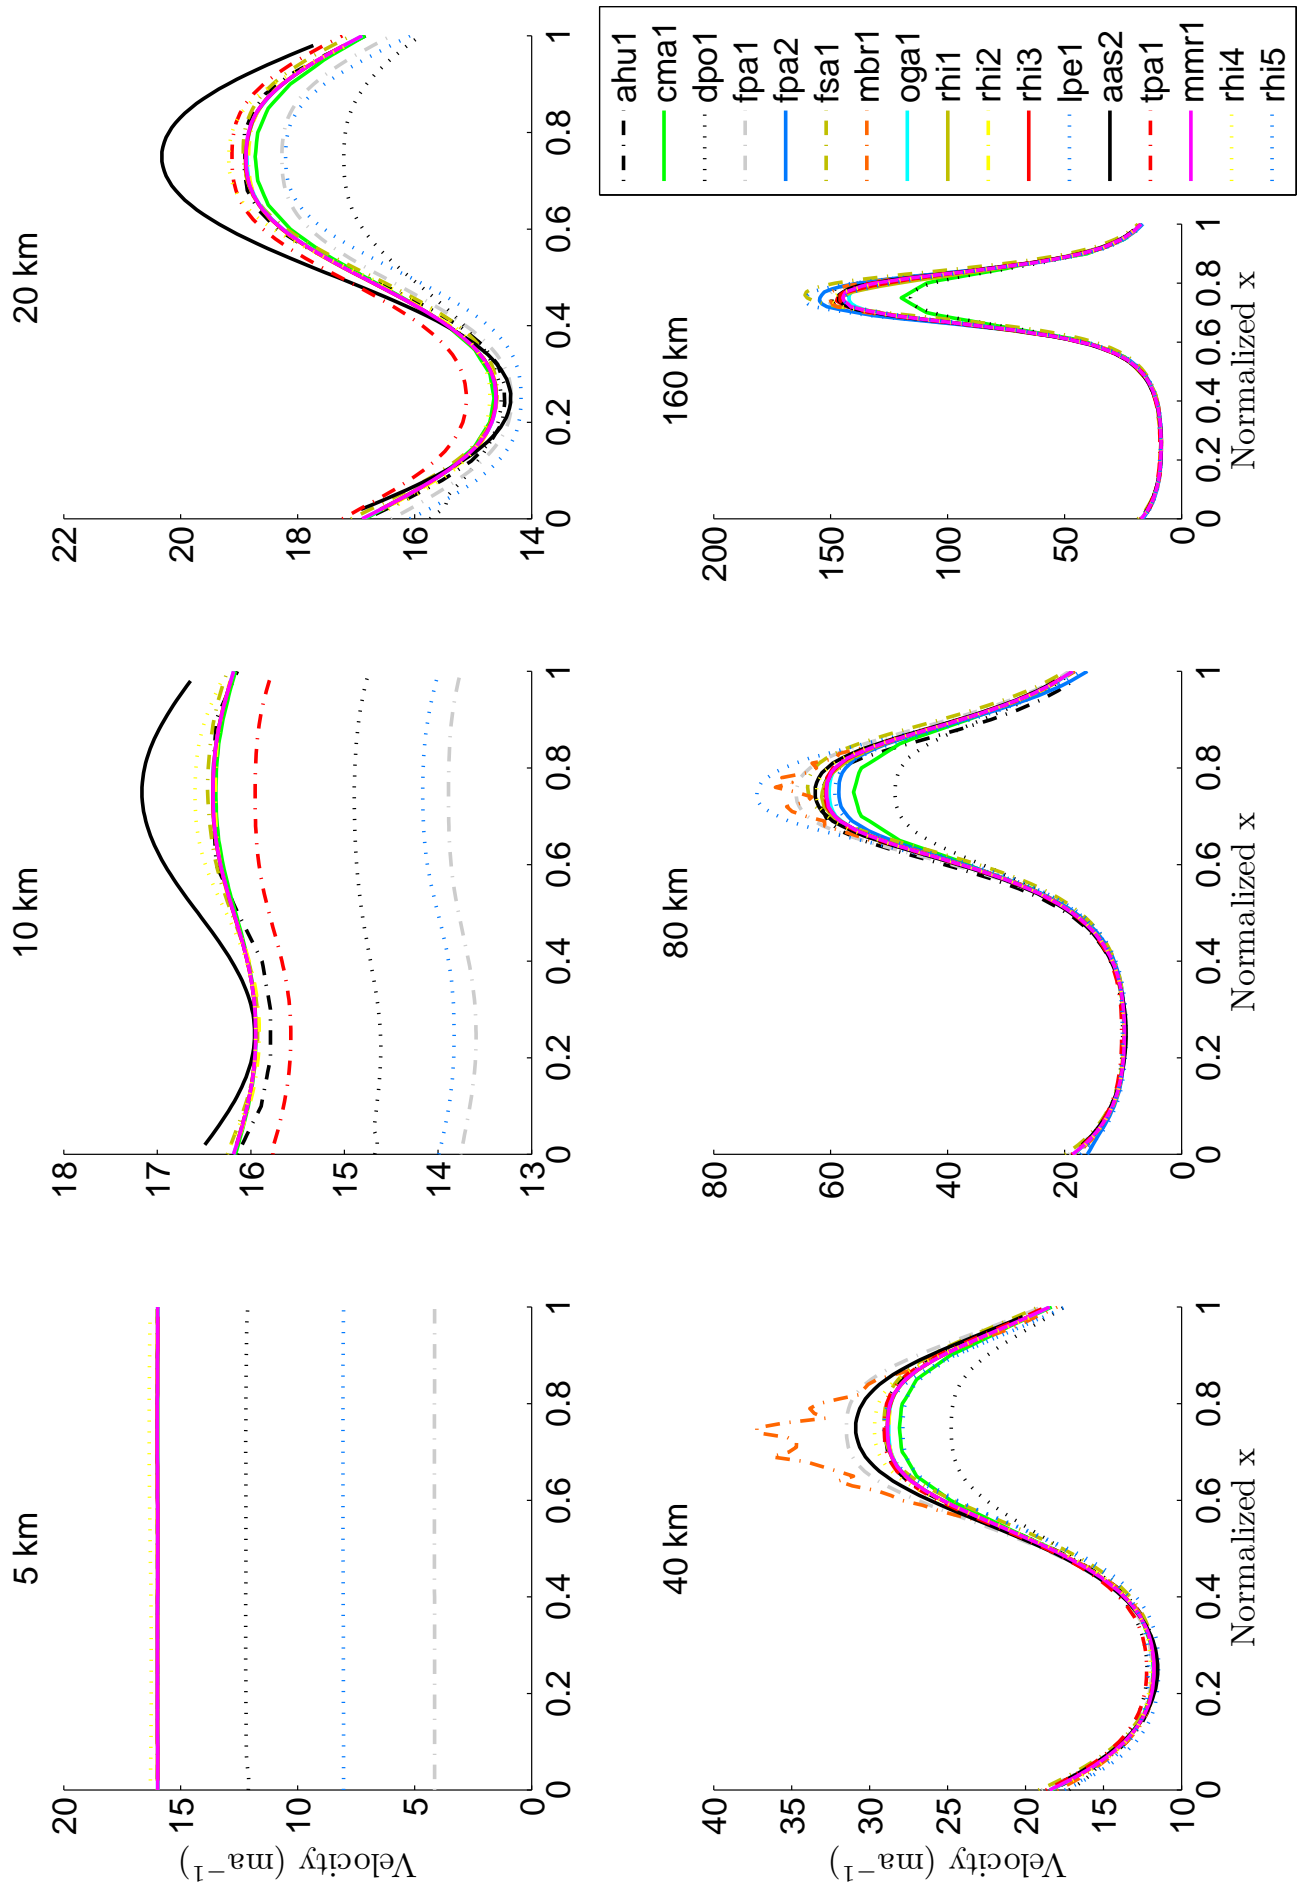

FIG. 17 – ExpC - Surface velocity in the x direction for each domain length.



FIG. 18 – ExpC - Shear stress  $txz$  for each domain length.

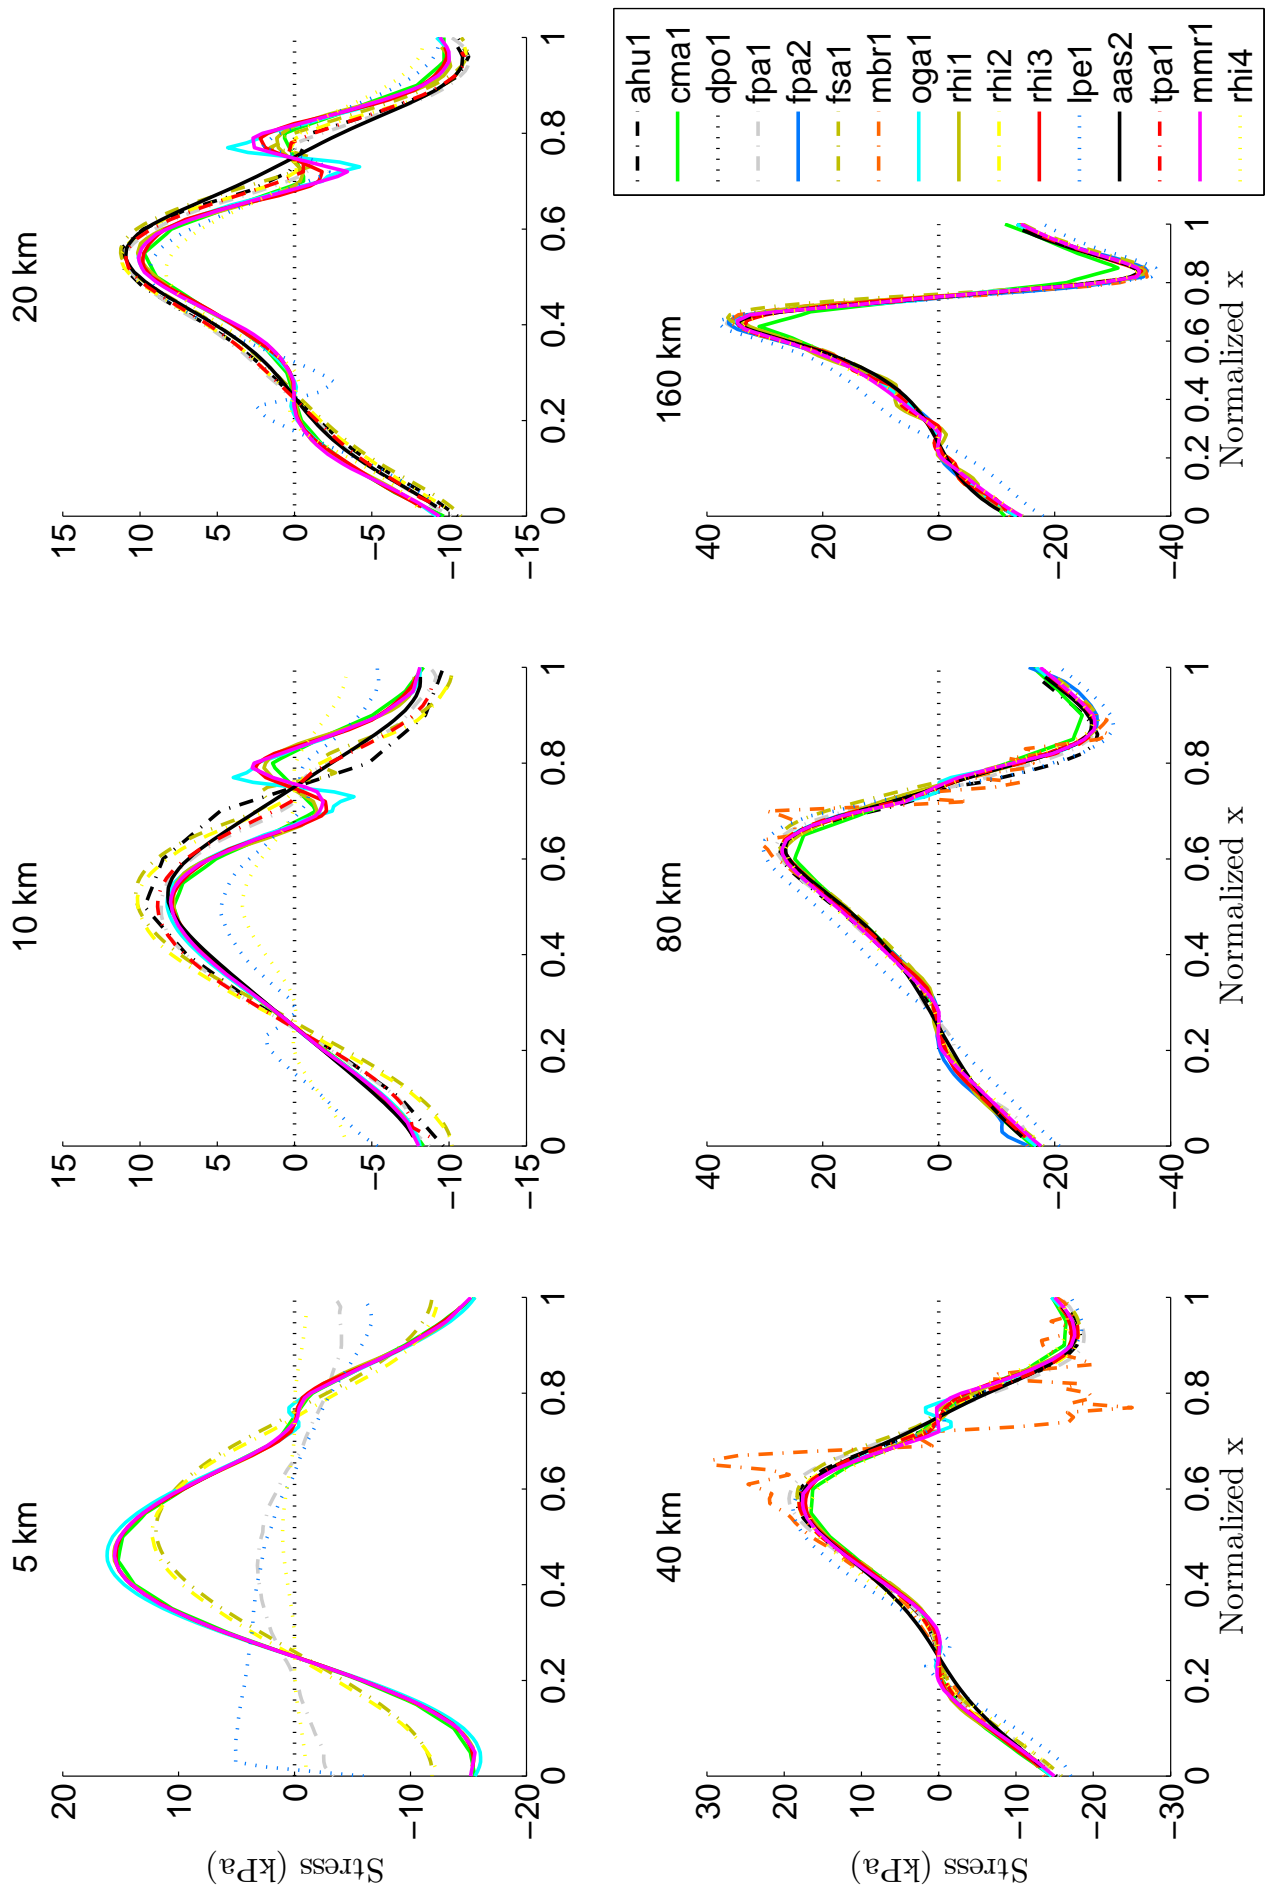

FIG. 19 – ExpC - Dp for each domain length.

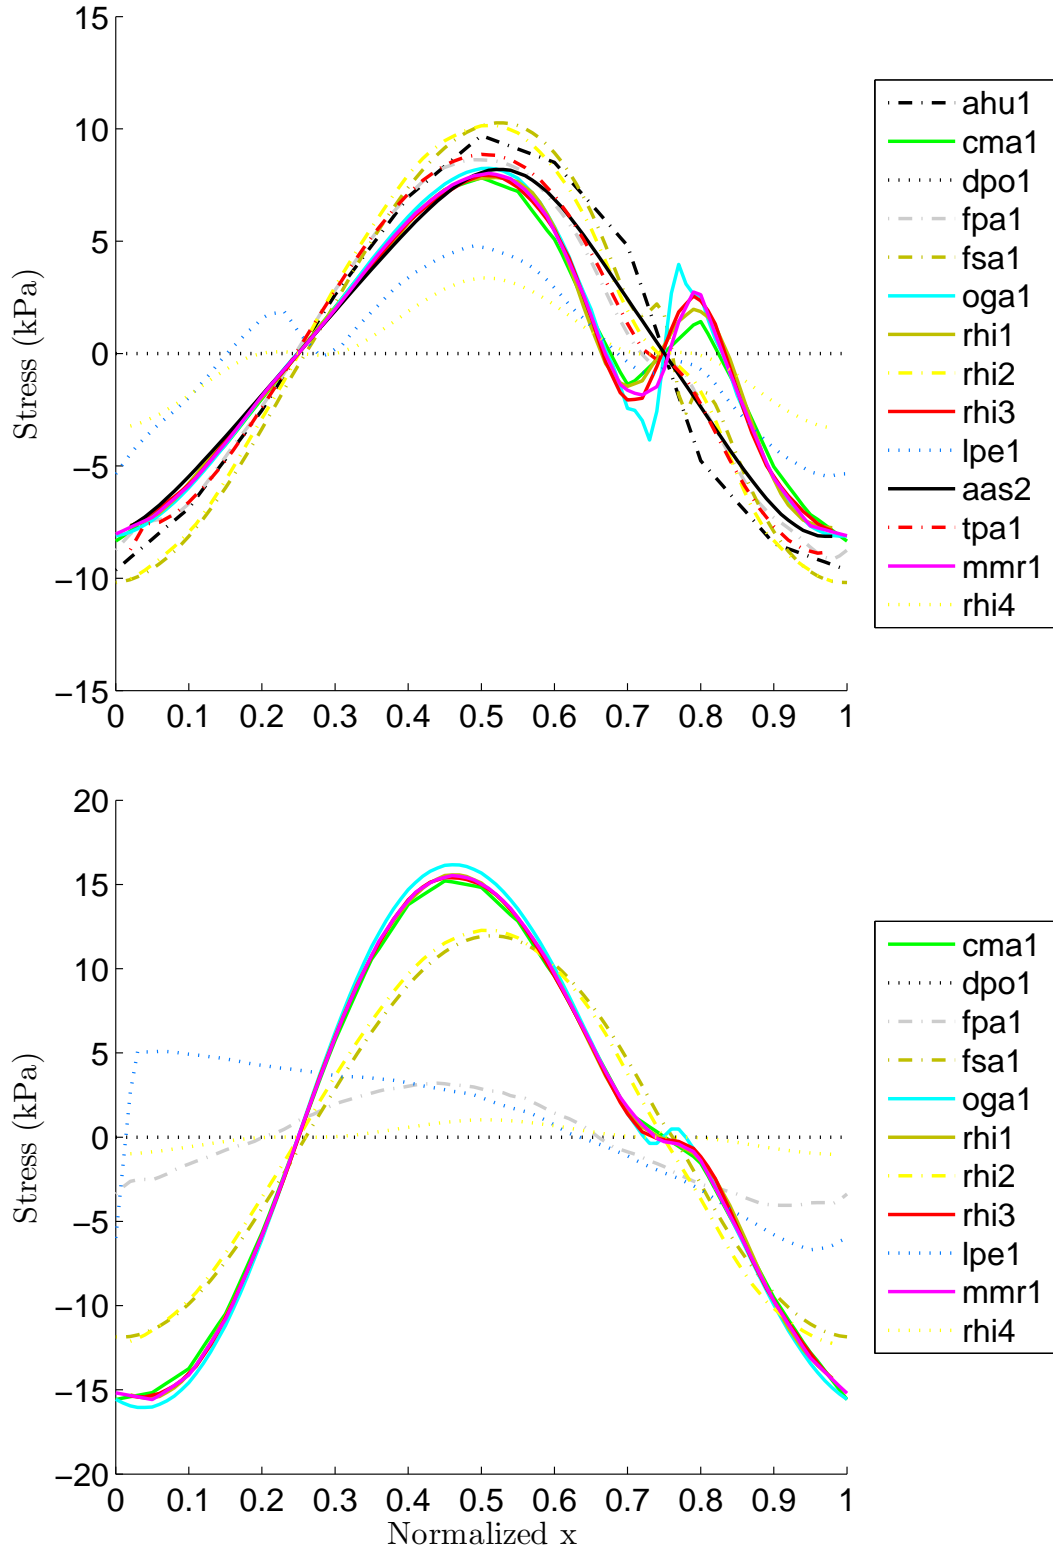

FIG. 20 – ExpC - Dp for 10 km and 5 km



# Experiment D

This is a 2D ice-stream experiment (flowline). Please see details in the 2006 ISMIP-HOM intercomparison exercise settings.

Firstly, we present velocity at surface, shear stress  $\tau_{xz}$  and  $dp$  in the x direction for  $y = 0.25$  for domain lengths of 5 *km* and 10 *km* (lengthscales where significant differences and variations are observed).

Secondly, we present the maximum/minimum over whole domain at each domain length for velocity in x direction (and the maximum amplitude of the velocity in the x direction), for shear stress  $\tau_{xz}$  and  $dp$ .

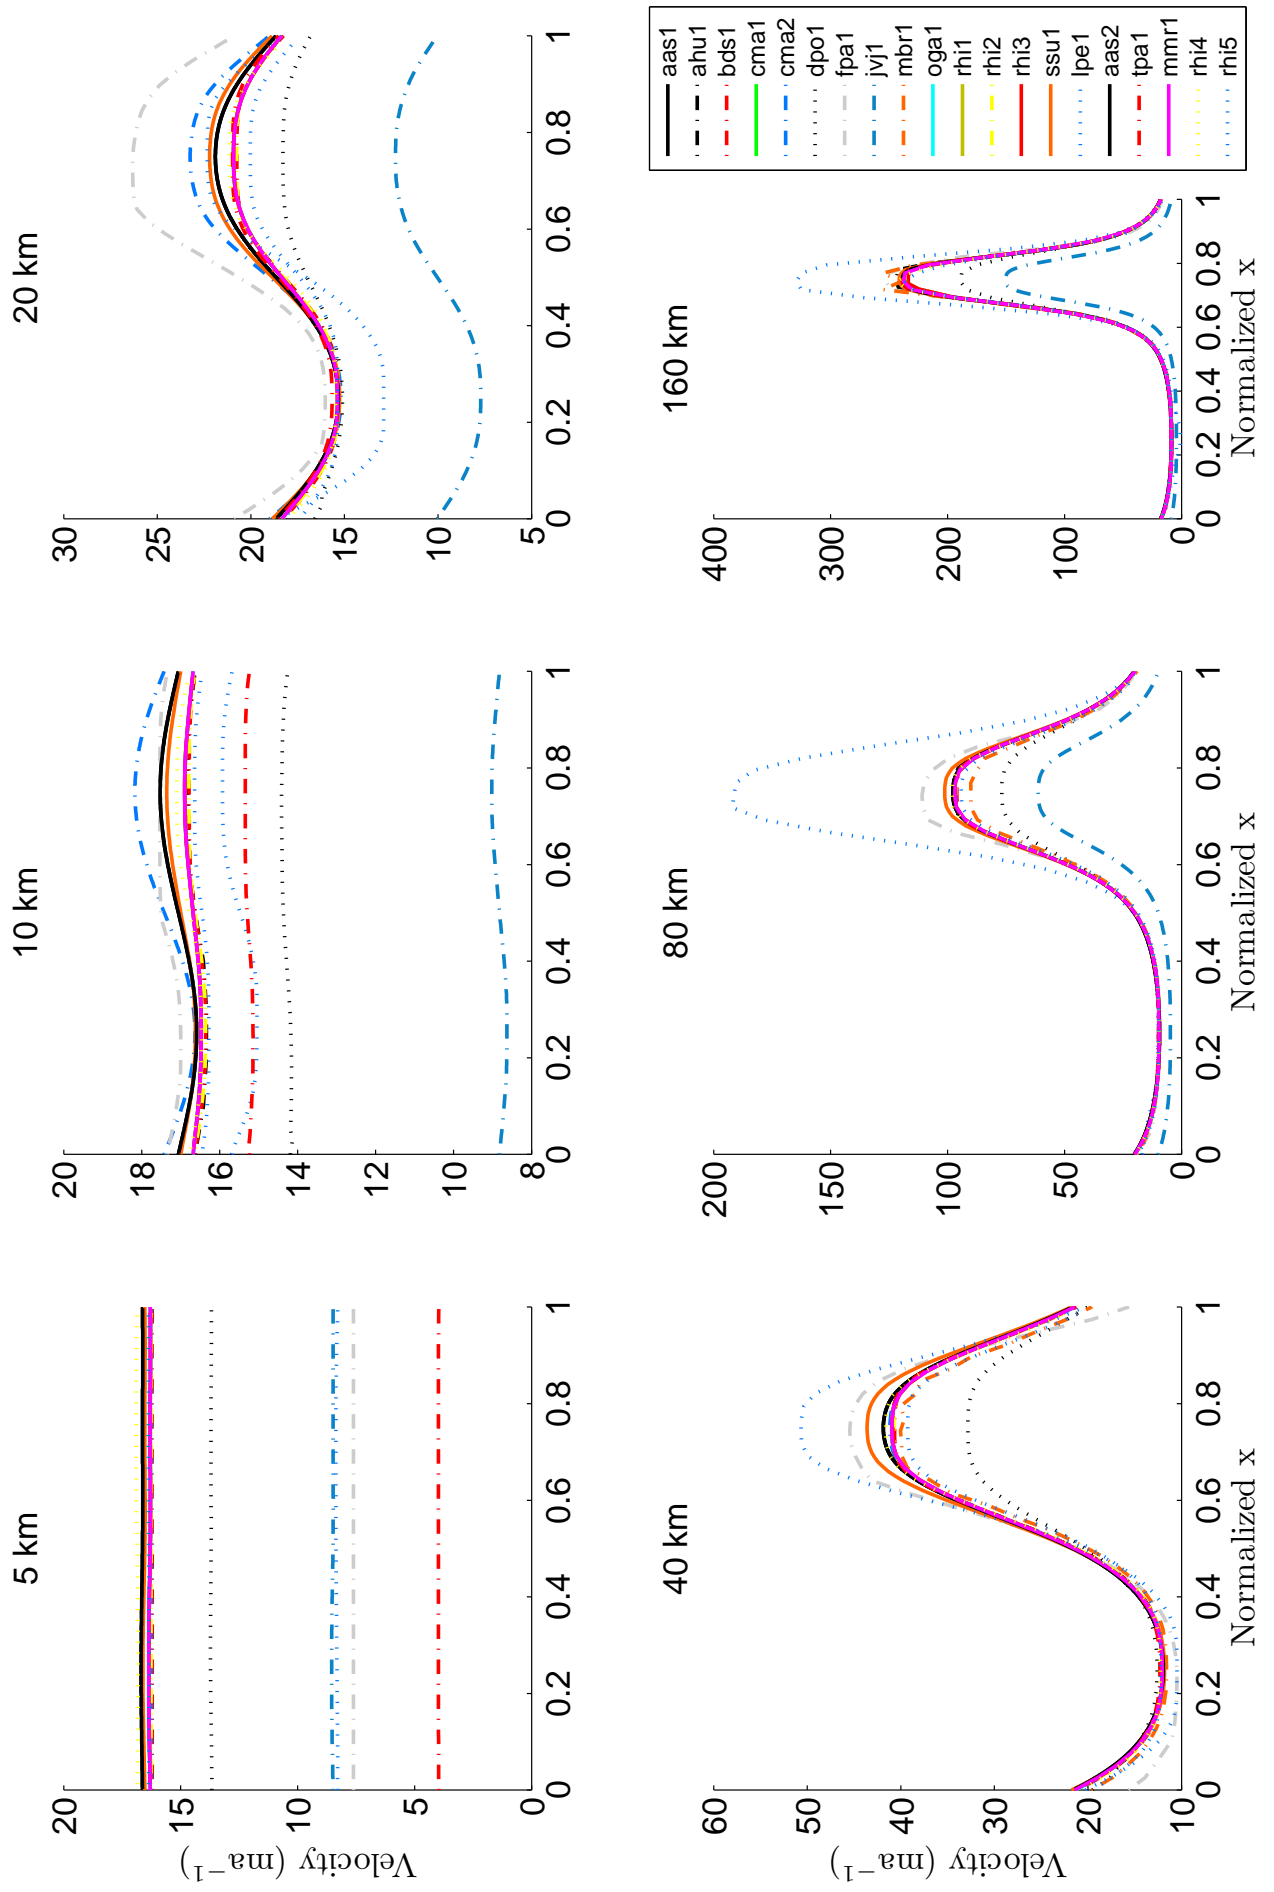

FIG. 21 – ExpD – Surface velocity in the x direction for each domain length.

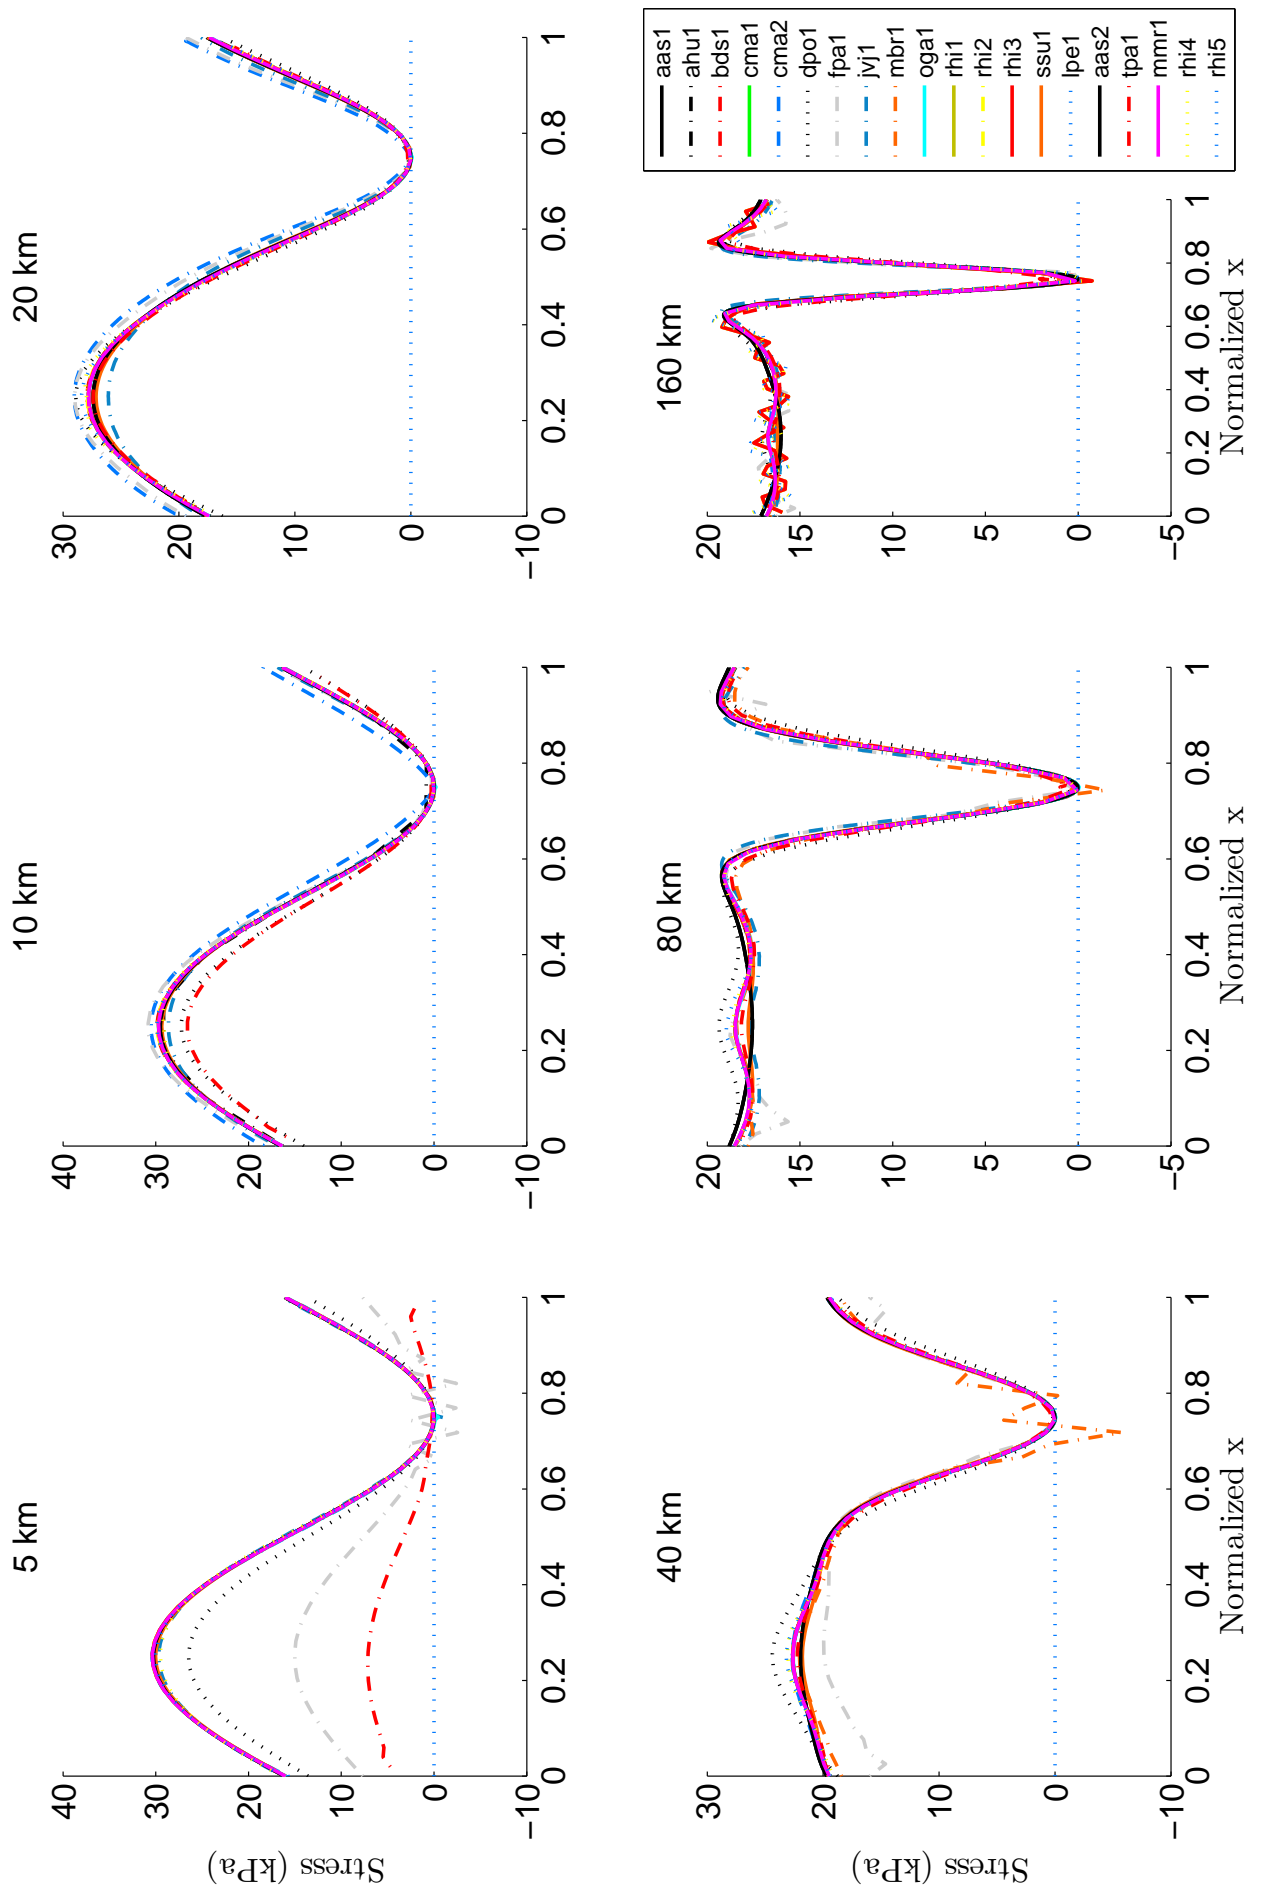

FIG. 22 – ExpD - Shear stress  $txz$  for each domain length.

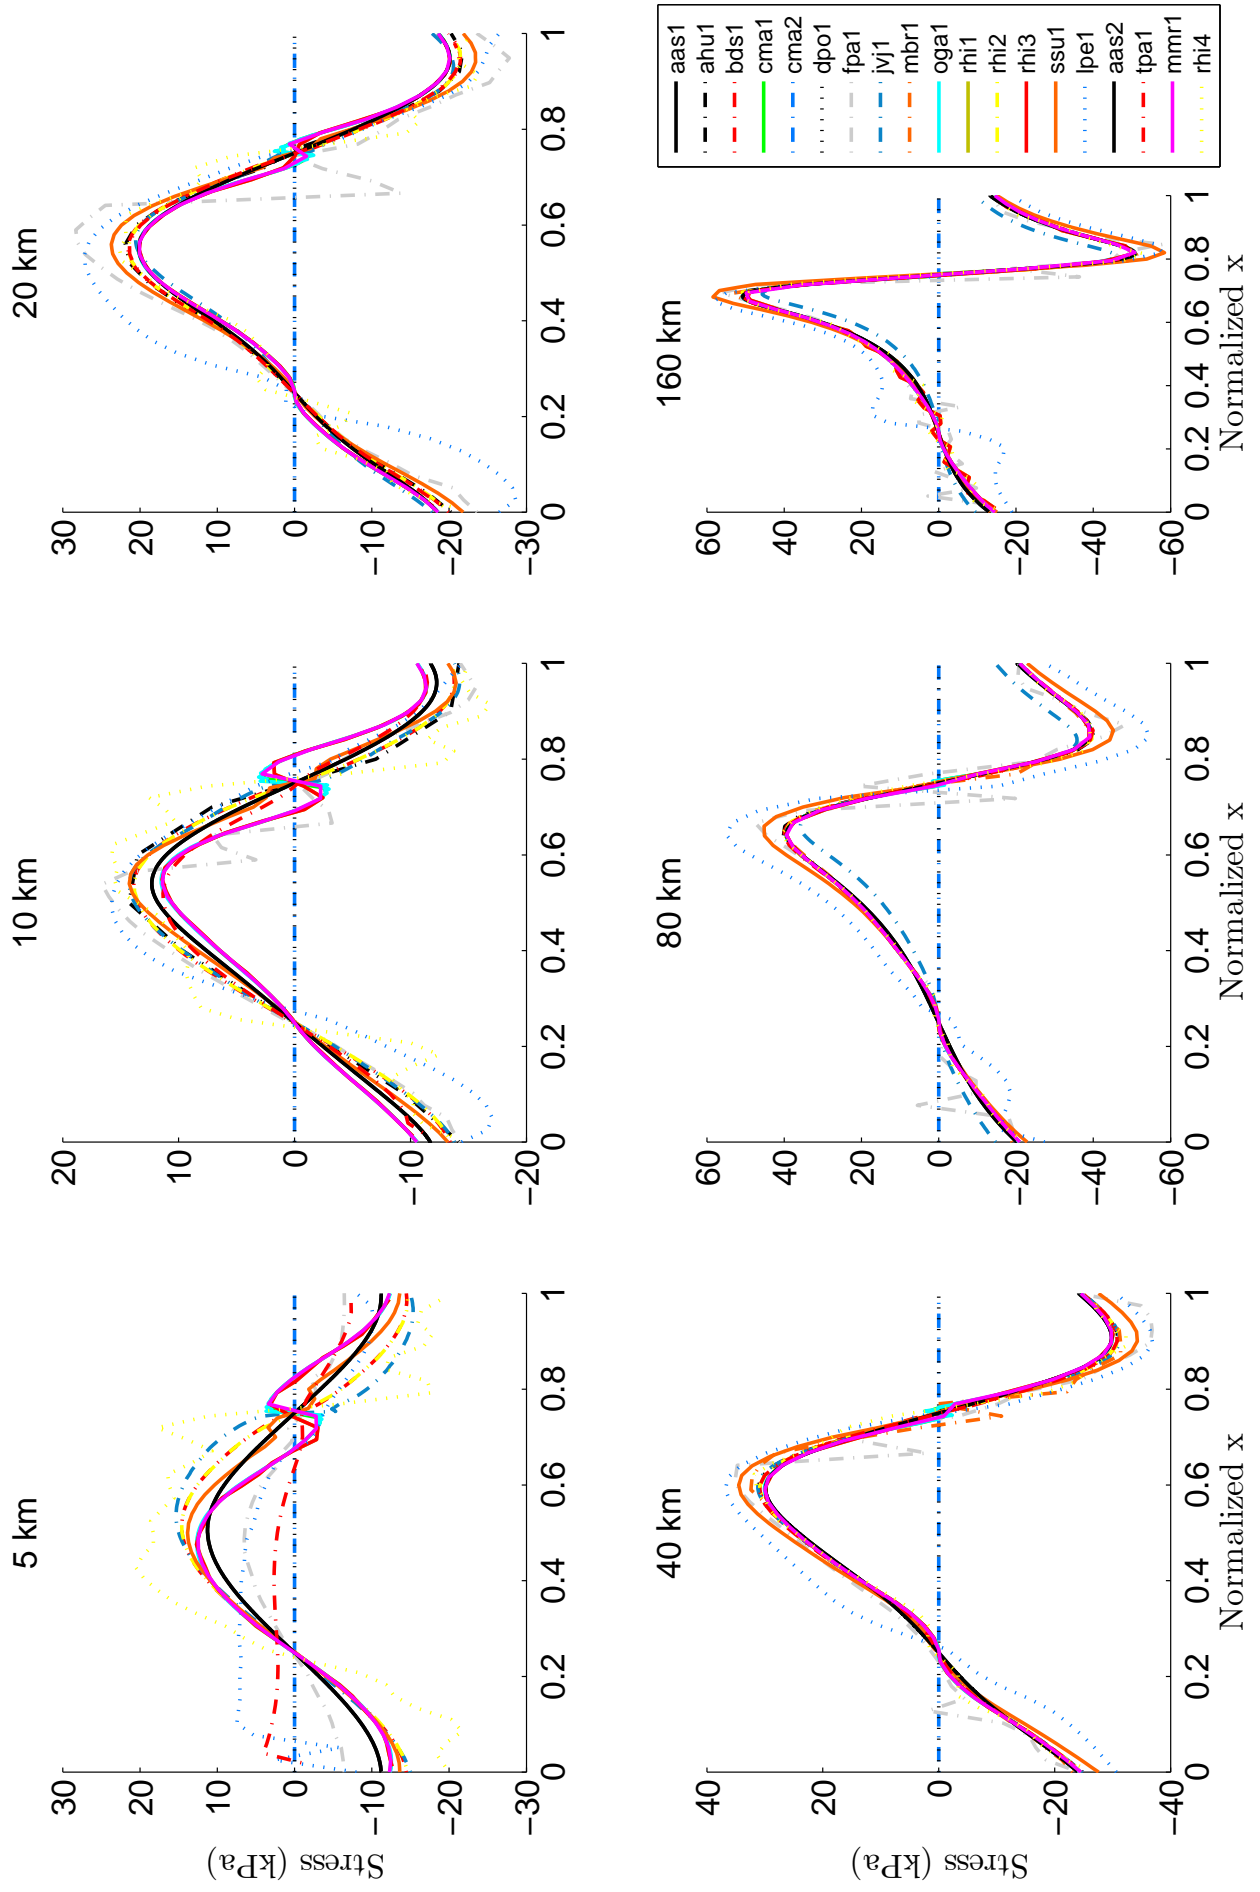

FIG. 23 – ExpD - Dp for each domain length.

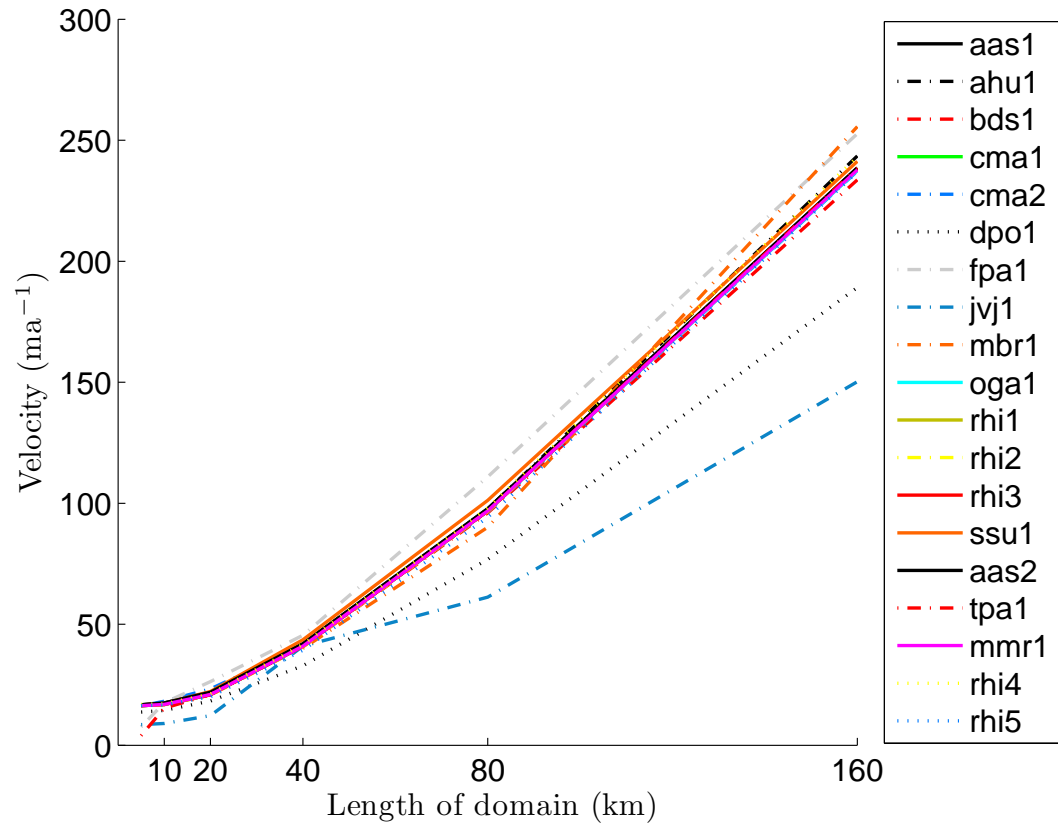

FIG. 24 – ExpD - Maximum surface velocity value in x direction for each domain length.

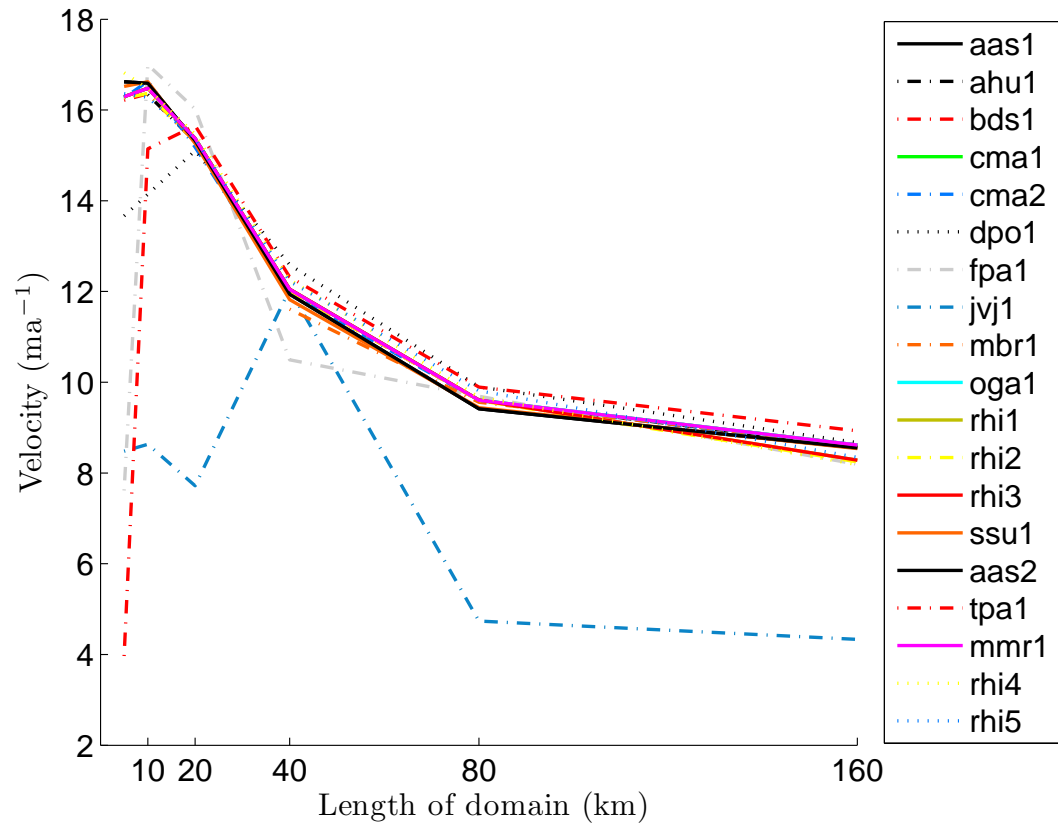

FIG. 25 – ExpD - Minimum surface velocity value in x direction for each domain length.

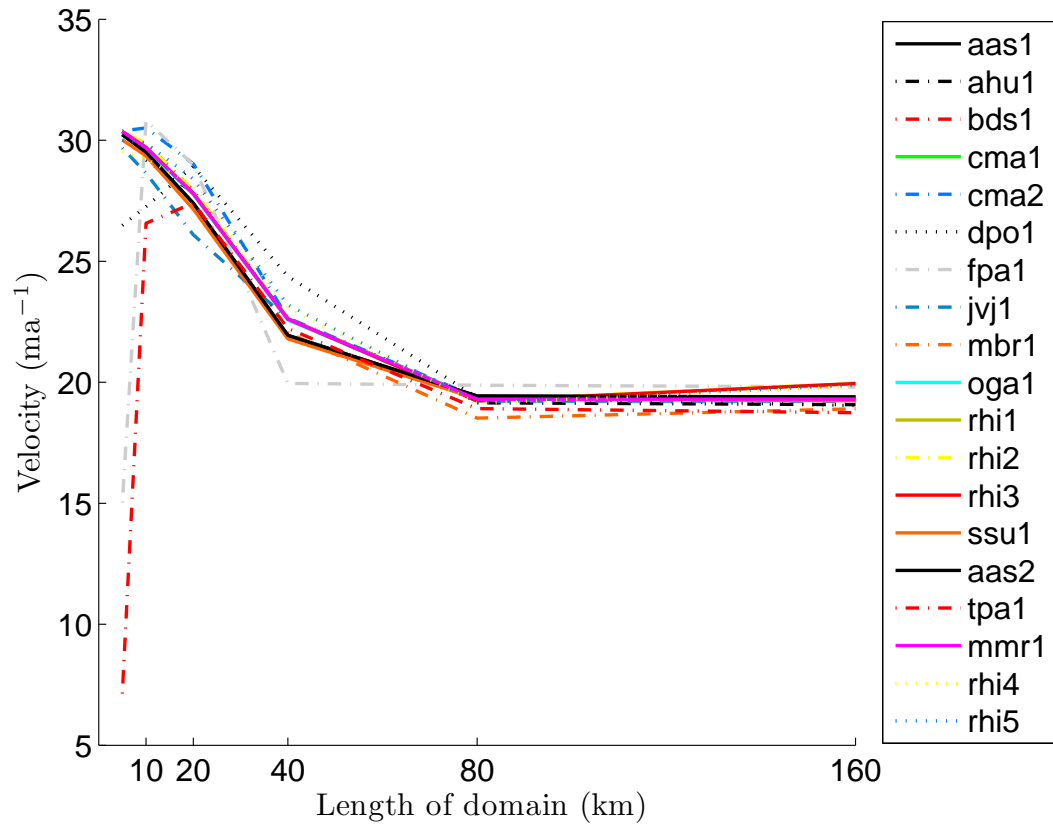

FIG. 26 – ExpD - Maximum shear stress  $\tau_{xz}$  value for each domain length.

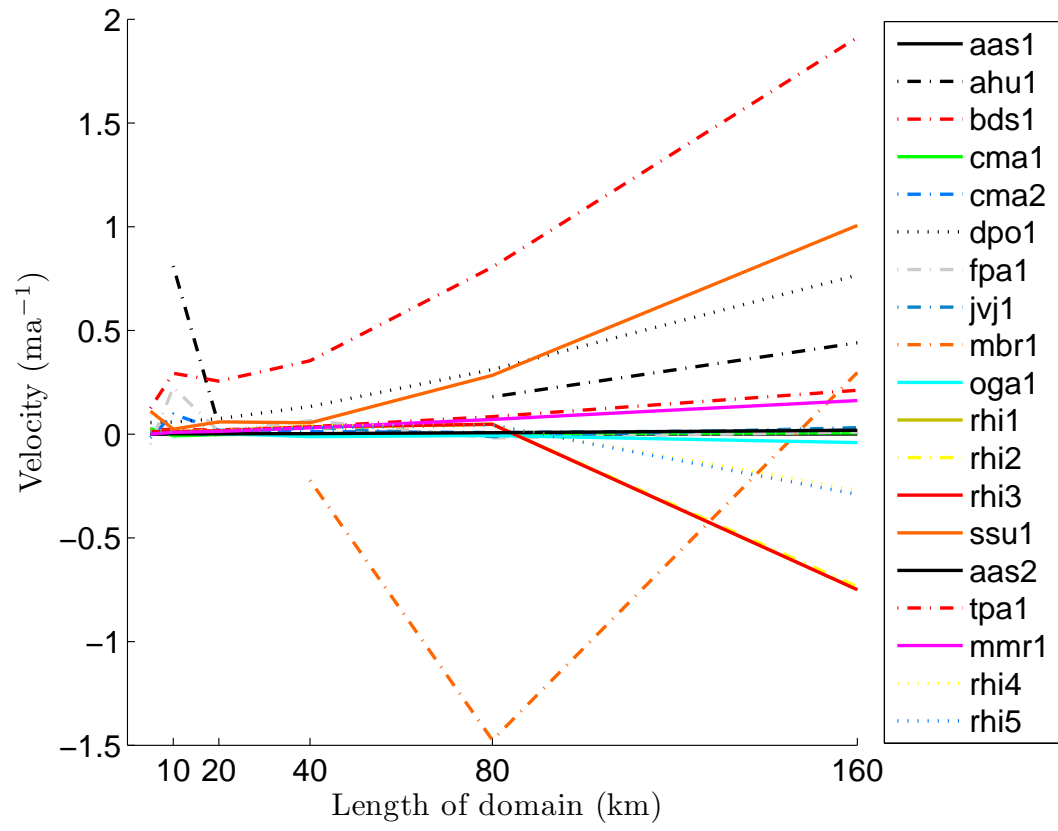

FIG. 27 – ExpD - Minimum shear stress  $\tau_{xz}$  value for each domain length.



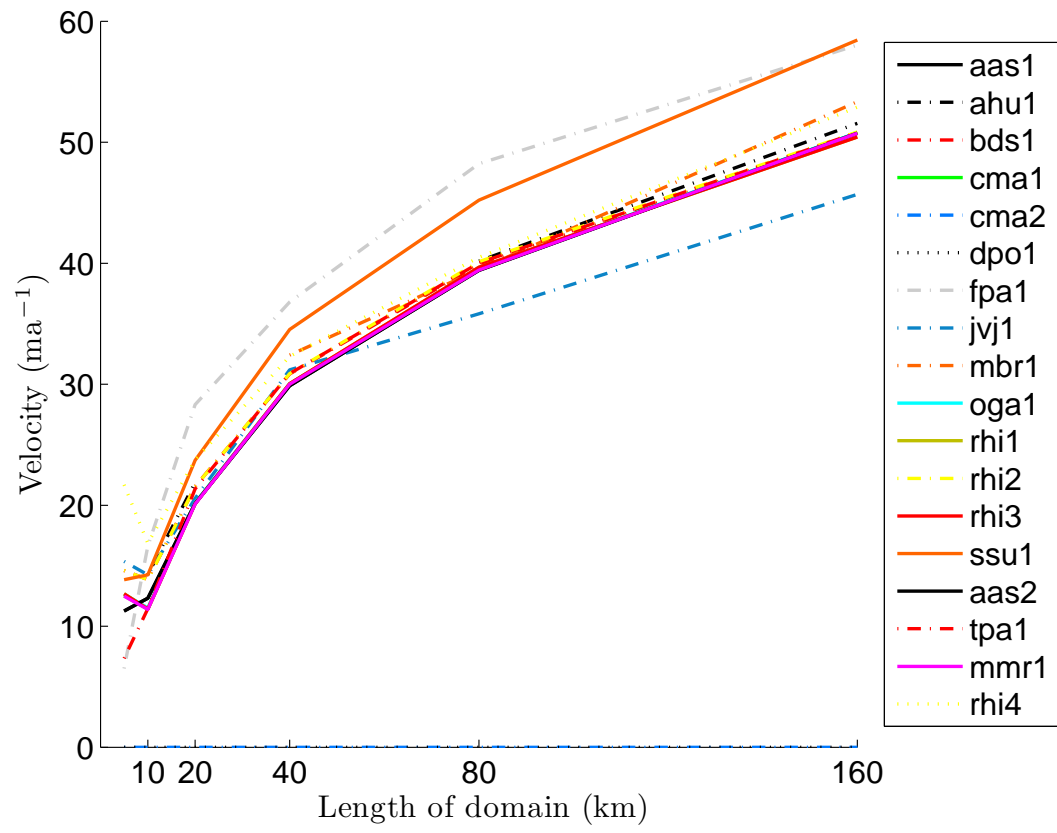

FIG. 28 – ExpD - Maximum dp value

# Experiment E

This is a 2D ice-stream experiment. Please see details in the 2006 ISMIP-HOM intercomparison exercise settings. Velocity and shear stress are presented for zero sliding conditions and non-zero sliding conditions along the profile of the domain.

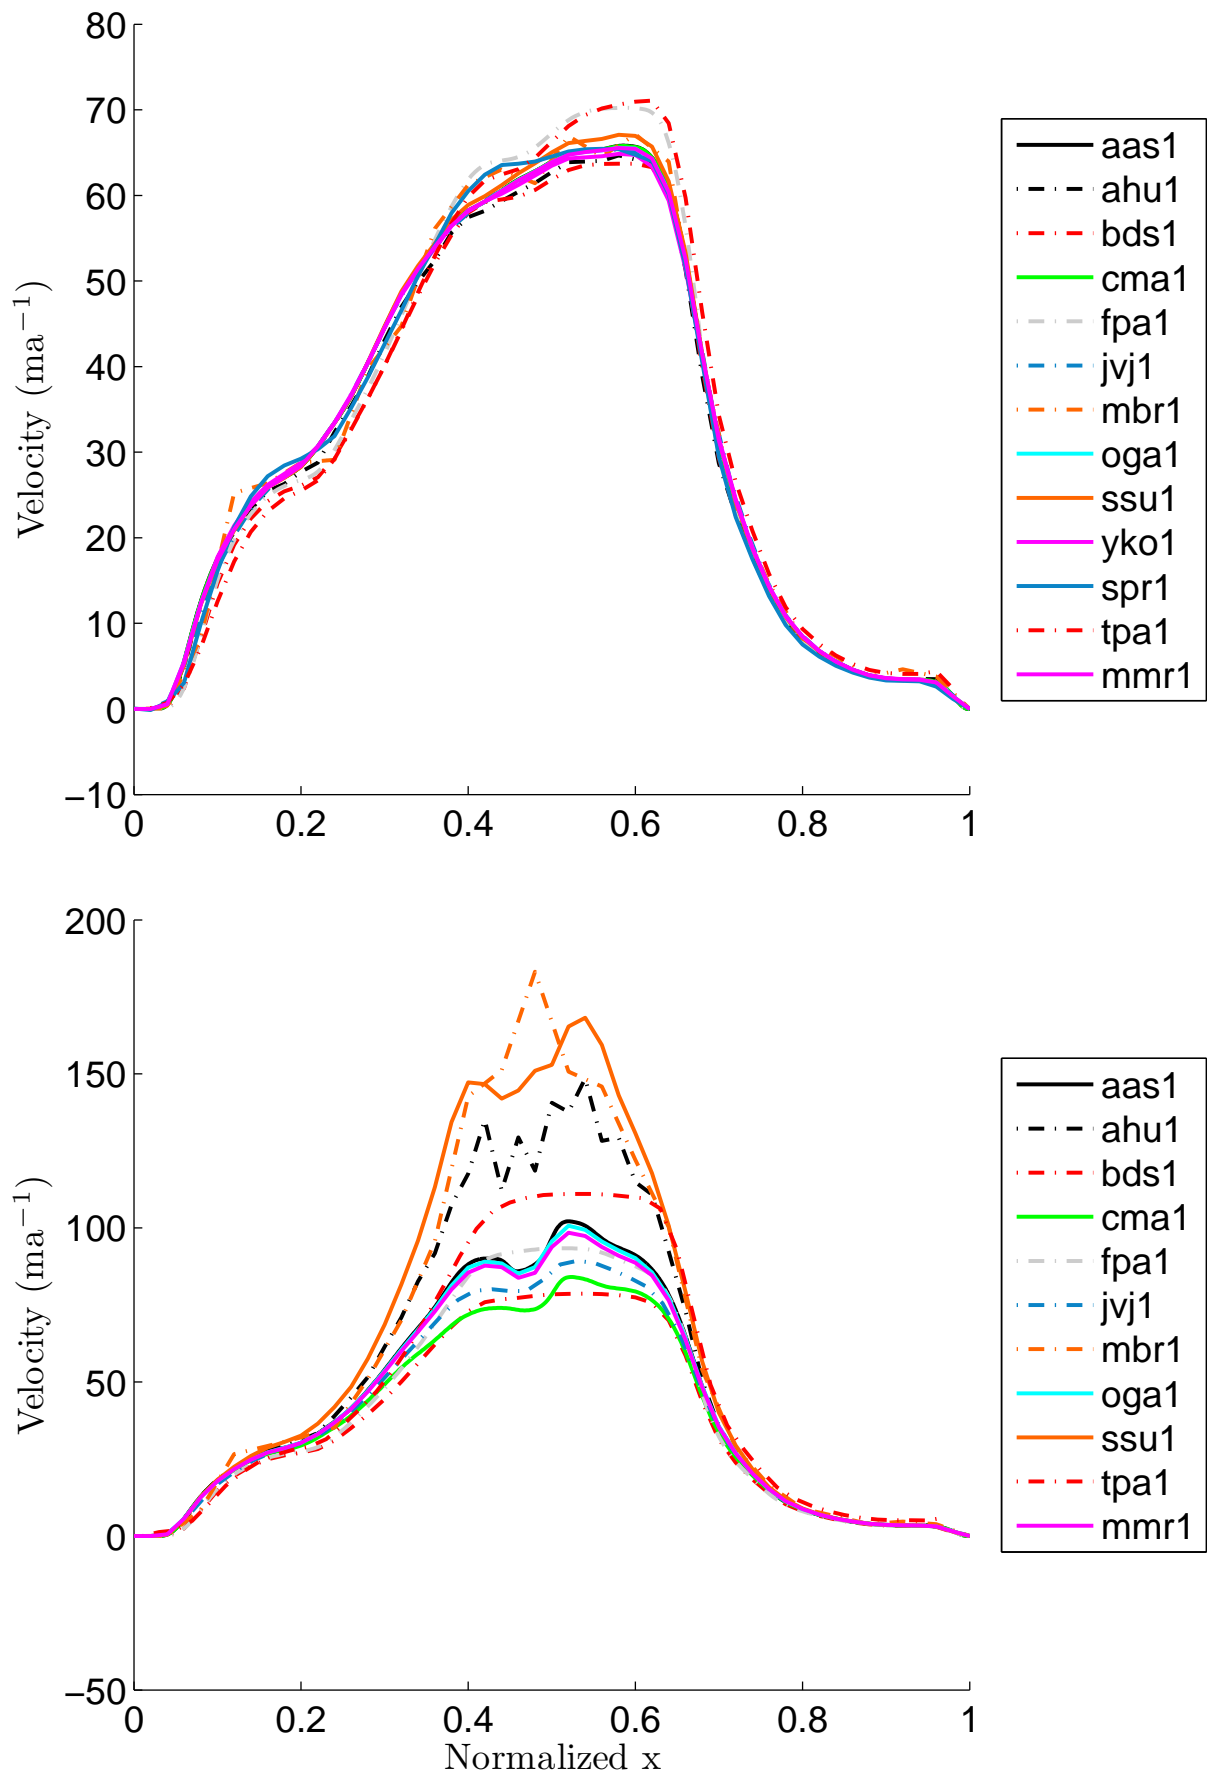

FIG. 29 – ExpE - Surface velocity in flow direction for non slippery and slippery case.

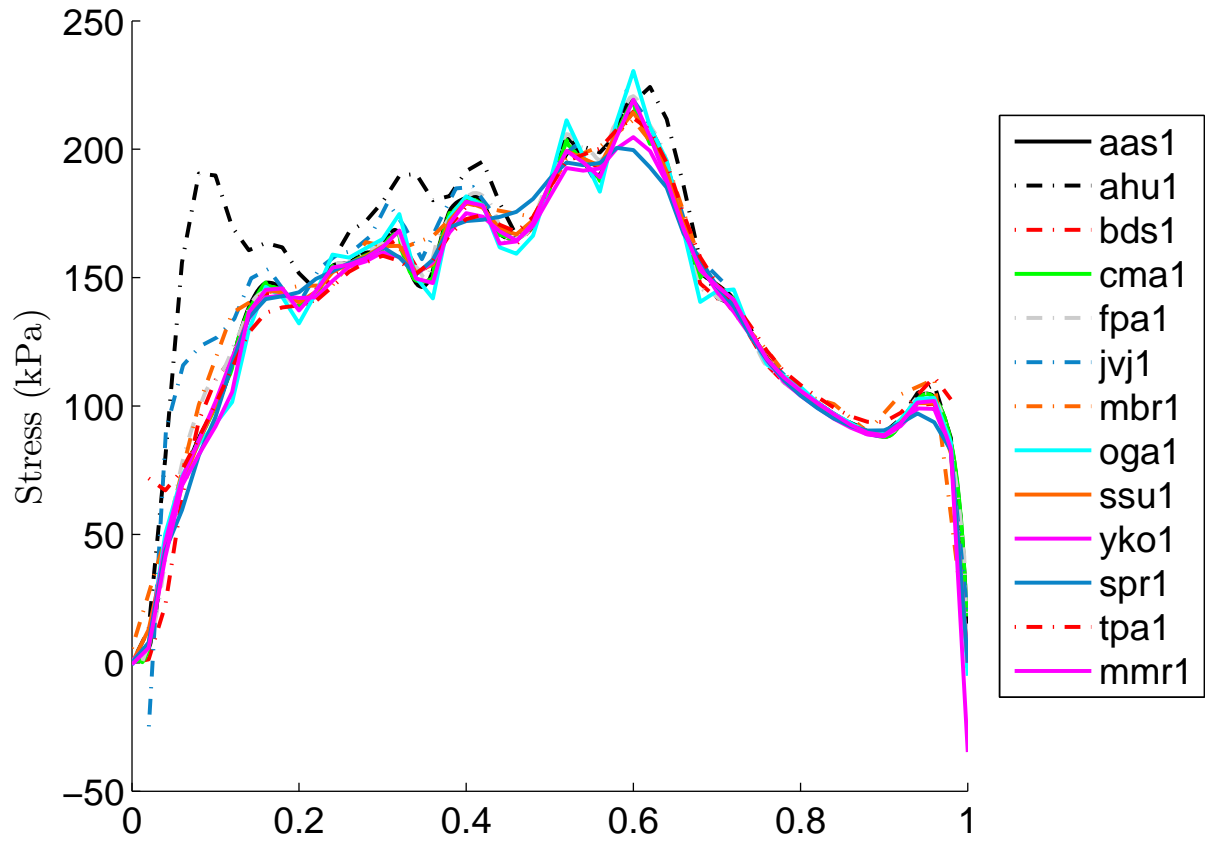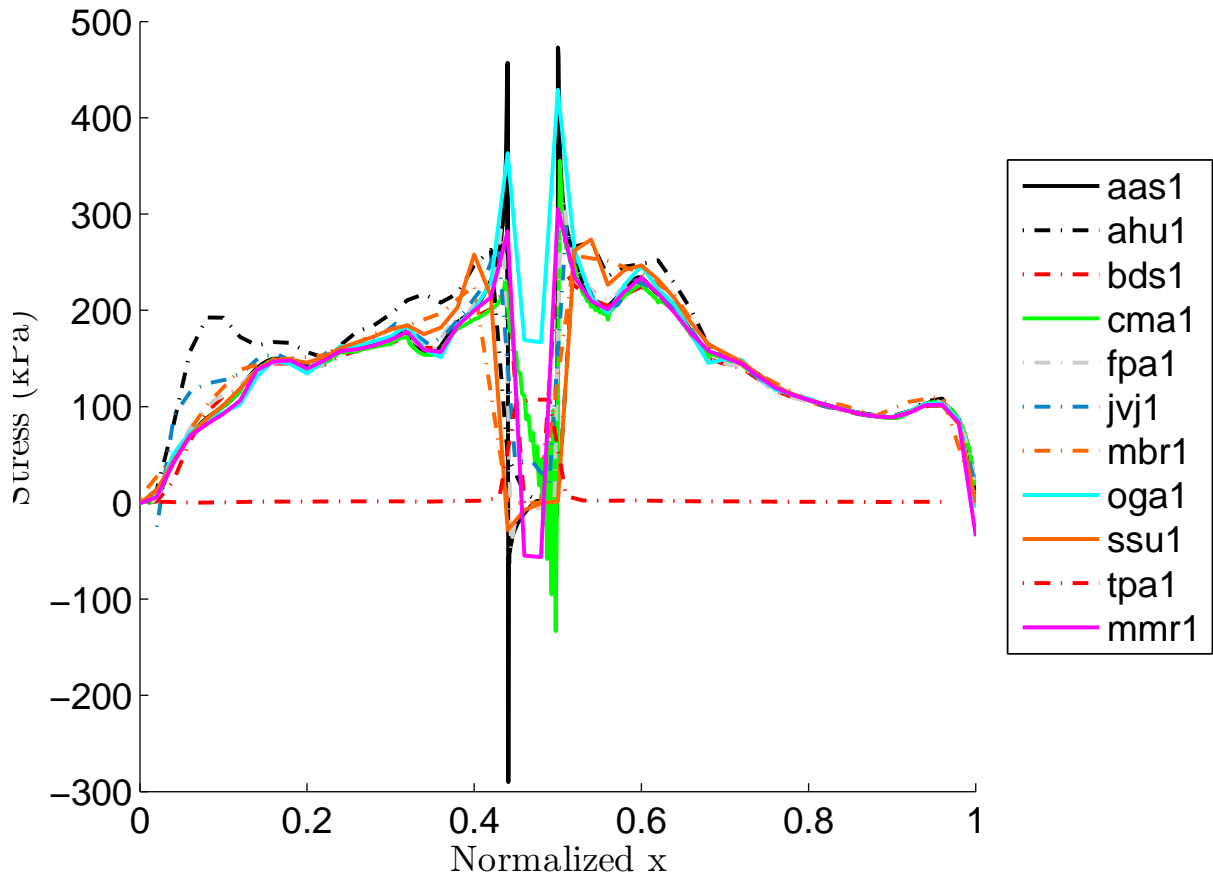

FIG. 30 – ExpE - Shear stress  $\tau_{xz}$  for non slippery and slippery case.

# Experiment F

This is A 3D time dependant ice-sheet experiment. Please see details in the 2006 ISMIP-HOM intercomparison exercise settings. Perturbed values of the surface elevation, velocity in x direction and in z direction are presented for  $y=0$  (half of the domain length) for zero sliding condition and non-zero sliding condition.

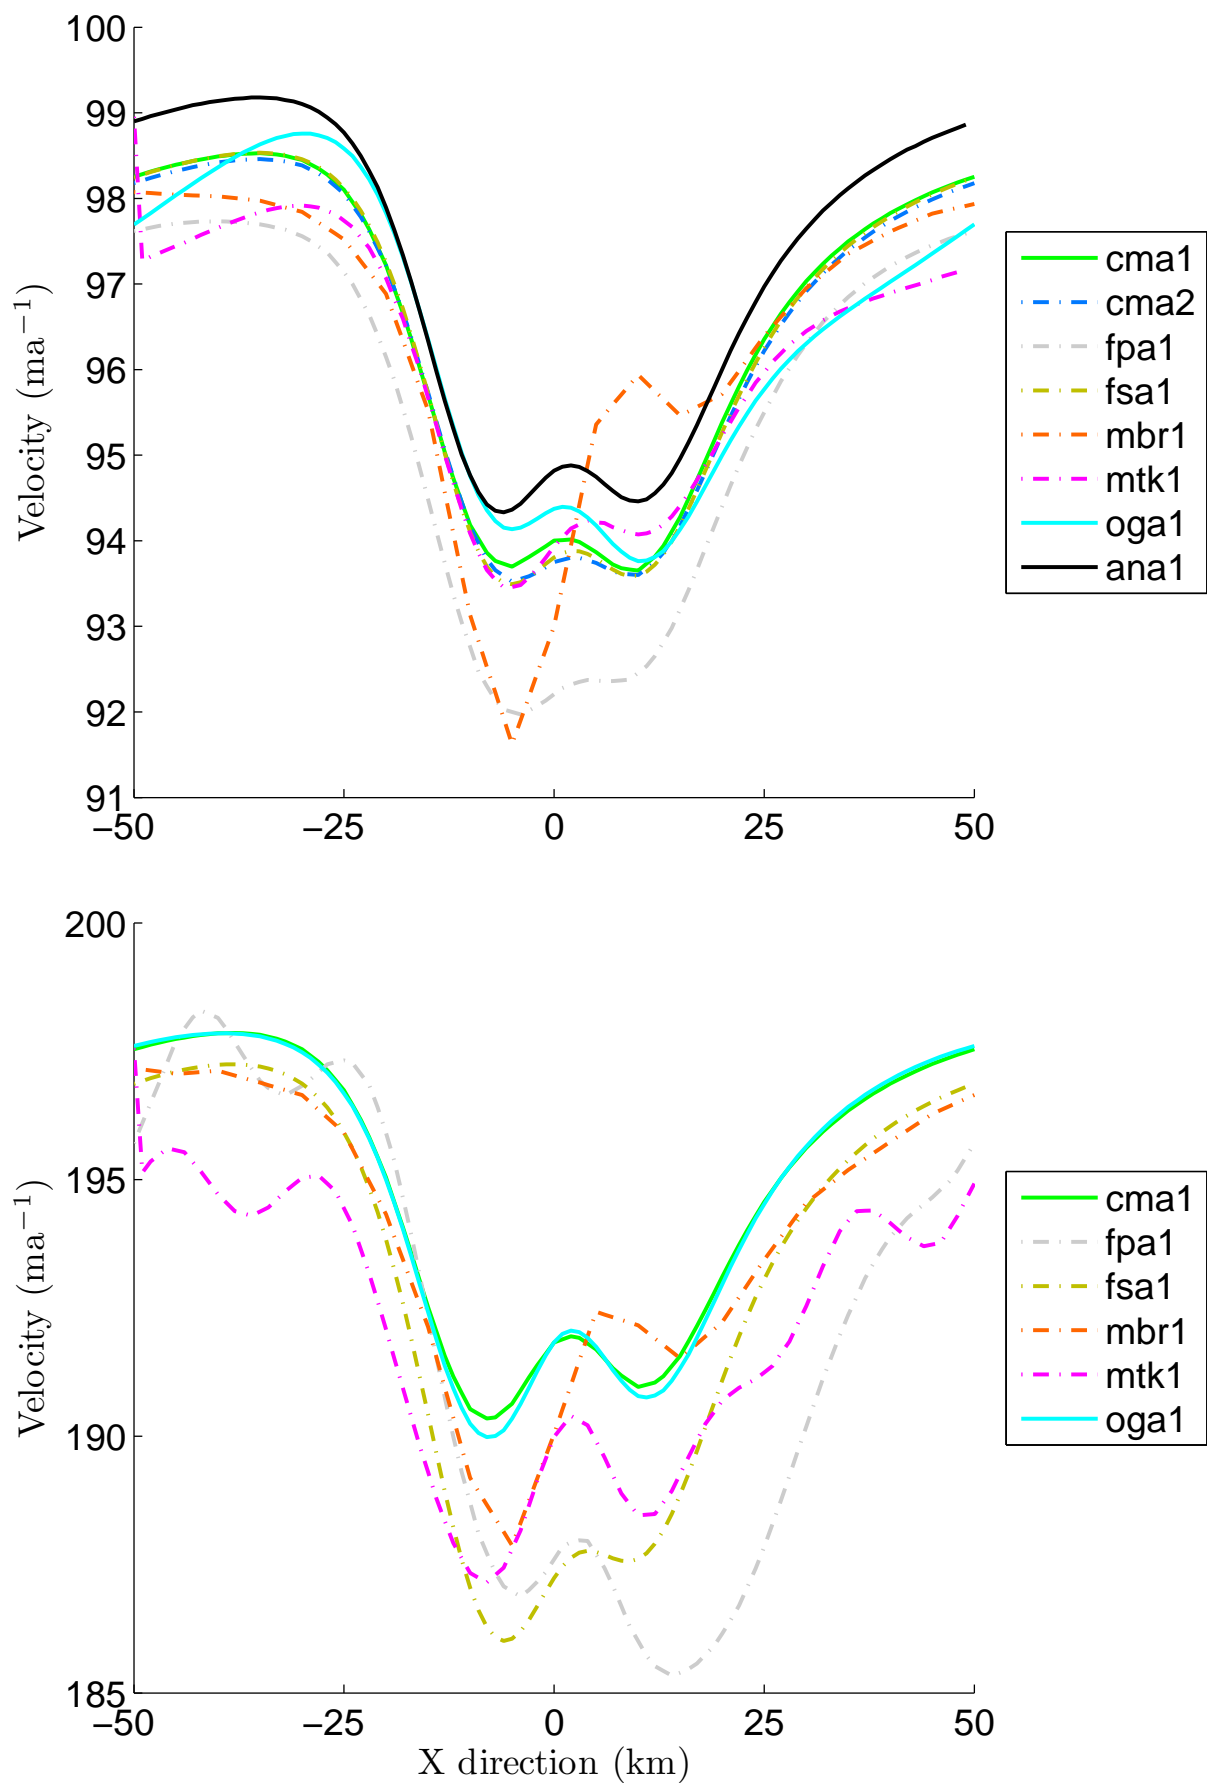

FIG. 31 – ExpF - Surface velocity in flow direction for non slippery and slippery case

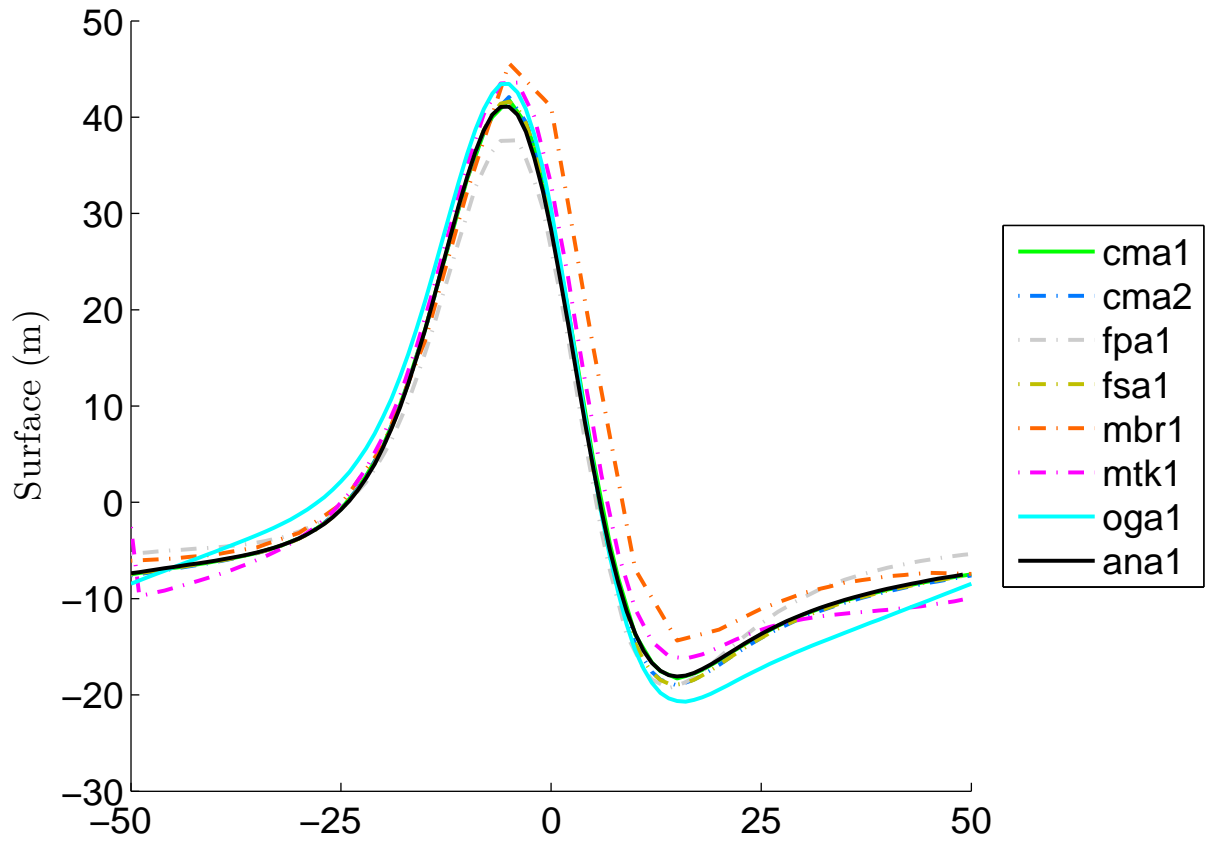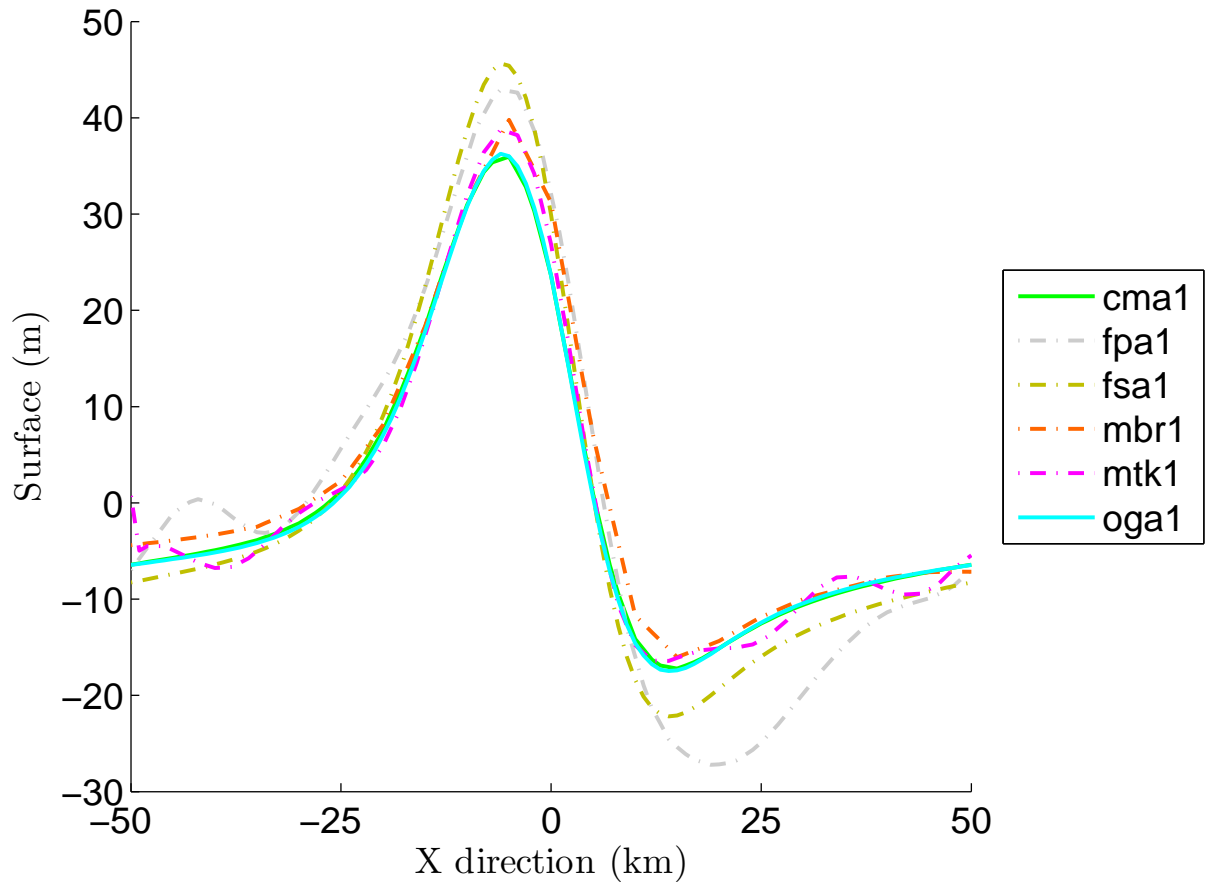

FIG. 32 – ExpF - Surface elevation for non slippery and slippery case.
